# Supplementary material for: Analysis of terpenoids and their gene regulatory networks on the basis of the transcriptome and metabolome of Opisthopappus longilobus
Source: Front Plant Sci. 2022 Sep 21;13:1015942. doi: 10.3389/fpls.2022.1015942 (PMC9533026; doi:10.3389/fpls.2022.1015942)
Supplement: Supplementary File 3 — Terpenoid metabolites in O. longilobus leaves and inflorescences. [file DataSheet_3.xlsx]

## Sheet: Sheet1
Index	Quantitative ion	Qualitative ion	Molecular weight (Da)	Formula	Compounds	Class I	CAS	NIST_RI	CTLeaf-1	CTLeaf-2	CTLeaf-3	CTBloom-1	CTBloom-2	CTBloom-3	CTcolour-1	CTcolour-2	CTcolour-3	CTFlower-1	CTFlower-2	CTFlower-3	QC01	QC02	QC03	QC04	QC05	cpd_ID	kegg_map
D163	95	69	166.099	C10H14O2	dl-Camphoroquinone	Terpenoids	10373-78-1	1319	30329.4	58271.1	16050.5	821515	304264	689480	3.12636e+06	3.68671e+06	3.40653e+06	4.41389e+06	5.21151e+06	4.8127e+06	712284	784490	730793	619356	670956	-	-
D167	95	110	154.136	C10H18O	1,7,7-Trimethylbicyclo[2.2.1]heptan-2-ol	Terpenoids	10385-78-1	1138	71357.7	21146.9	10475.1	3.57181e+06	1.45128e+06	2.19699e+06	937354	1.52815e+06	1.23275e+06	1.35229e+06	1.62921e+06	1.49075e+06	5.68329e+07	5.97629e+07	5.45118e+07	5.05248e+07	4.9005e+07	-	-
D177	110	95	220.183	C15H24O	(1aR,1bS,2aS,5S,5aS,7aS)-2,2,5,7a-Tetramethyldecahydrocyclopenta[2',3']cyclobuta[1',2':3,4]benzo[1,2-b]oxirene	Terpenoids	104188-24-1	1549	985163	1.68578e+06	560044	3.40904e+06	6.12543e+06	2.98332e+06	3.73856e+06	38237.7	1.8884e+06	466382	289263	377823	2.1619e+06	2.24027e+06	1.94015e+06	1.57137e+06	1.92094e+06	-	-
D178	205	105	220.183	C15H24O	(1R,3aR,5aR,9aS)-1,4,4,7-Tetramethyl-1,2,3,3a,4,5a,8,9-octahydrocyclopenta[c]benzofuran	Terpenoids	104188-25-2	1544	67863.3	220115	51669.5	827879	892195	407401	930059	404191	667125	541796	685144	613470	432372	518622	476269	407765	497881	-	-
D192	81	80	154.136	C10H18O	Fenchol	Terpenoids	1632-73-1	1113	358445	217573	123633	6.53992e+07	2.84541e+07	3.67417e+08	1.06975e+08	1.29625e+08	1.183e+08	8.82618e+07	2.25001e+07	5.5381e+07	1.62615e+08	1.76095e+08	1.55849e+08	1.4331e+08	1.40748e+08	C02344	ko00902,ko01110
D193	68	79	152.12	C10H16O	p-Mentha-1,8-dien-7-ol	Terpenoids	536-59-4	1296	14896.4	20432.3	7473.55	2.5598e+06	14473221	6.18491e+06	8900035	4.04106e+06	6.47055e+06	4.74508e+06	5.18232e+06	4.9637e+06	4.46538e+06	5.0038e+06	3.66742e+06	2.93158e+06	2.91109e+06	C02452	ko00902,ko00903,ko01110
D197	67	109	152.12	C10H16O	3-Oxatricyclo[4.1.1.0(2,4)]octane, 2,7,7-trimethyl-	Terpenoids	1686-14-2	1095	152105	199650	127405	582855	628424	516525	719734	480719	600227	637895	800736	719316	287845	353932	339369	295533	307226	C02759	ko00903
D216	121	93	206.167	C14H22O	.alpha.-Irone	Terpenoids	79-69-6	1526	204263	443191	105601	88546.2	178861	98281.2	203820	66655.7	135238	87879.6	133561	110720	325333	333827	296549	237207	271180	C09690	-
D241	69	41	222.198	C15H26O	3-Cyclohexene-1-methanol, .alpha.,4-dimethyl-.alpha.-(4-methyl-3-pentenyl)-, [R-(R*,R*)]-	Terpenoids	23178-88-3	1625	59449.9	97313.8	44074.8	116160	261388	103406	165864	3307.02	84585.7	13589.8	12338.5	12964.1	76185.6	88965.7	78452.2	62593.4	73437.7	-	-
D244	161	105	222.198	C15H26O	(3S,3aR,3bR,4S,7R,7aR)-4-Isopropyl-3,7-dimethyloctahydro-1H-cyclopenta[1,3]cyclopropa[1,2]benzen-3-ol	Terpenoids	23445-02-5	1515	559316	1.1788e+06	286777	1.57374e+06	1.41342e+06	758540	946000	299708	622854	487530	645920	566725	1.22565e+06	1.2122e+06	1.07038e+06	869443	1.05985e+06	C20172	-
D251	134	135	272.25	C20H32	Hibaene	Terpenoids	2359-73-1	1941	3719	21863	6709										4841	6855	6028	4403	6129	-	-
D276	108	107	150.104	C10H14O	Bicyclo[3.1.0]hex-3-en-2-one, 4-methyl-1-(1-methylethyl)-	Terpenoids	24545-81-1	1171	7148.88	5815.55	3212.94	3.65793e+06	1.66655e+06	1.29845e+06	3.98344e+06	5.13935e+06	4.56139e+06	5.56023e+06	6.124e+06	5.84211e+06	1.36647e+06	1.29868e+06	1.21302e+06	1.13095e+06	1.15732e+06	-	-
D282	81	83	238.193	C15H26O2	Citronellyl tiglate	Terpenoids	24717-85-9	1658	3.93356e+06	7.29811e+06	3.55307e+06	574727	755518	1.16001e+06	1.53078e+06	1.0788e+06	1.30479e+06	1.3047e+06	1.22807e+06	1.26639e+06	6.96155e+06	7.50767e+06	6.65718e+06	5.40824e+06	6.18349e+06	-	-
D300	105	189	204.188	C15H24	Aristolochene	Terpenoids	26620-71-3	1487	4.76959e+06	1.06668e+07	1.77452e+06	6.55244e+07	6.98902e+07	4.01614e+07	5.49803e+07	1.99925e+07	3.74864e+07	2.84368e+07	3.97183e+07	3.40776e+07	3.04676e+07	3.40706e+07	2.80539e+07	2.24195e+07	2.40338e+07	-	-
D306	85	41	154.136	C10H18O	1,5-Heptadien-4-ol, 3,3,6-trimethyl-	Terpenoids	27644-04-8	1084	1048.09	1750.89	971.267				47341.3	4404.14	25872.7	3286.26	5460.57	4373.41	66847.3	94625.9	66853.9	83149.5	63584.1	-	-	4373.41
D307	70	84	154.136	C10H18O	Bicyclo[3.1.1]heptan-3-ol, 2,6,6-trimethyl-, (1.alpha.,2.beta.,3.alpha.,5.alpha.)-	Terpenoids	27779-29-9	1179	5244.15	7287.57	3903.27	1.32175e+06	569446	750325	1.1802e+06	1.69089e+06	1.43555e+06	2.08306e+06	2.33437e+06	2.20872e+06	432326	467172	492847	476060	468225	-	-
D318	177	107	220.183	C15H24O	.beta.-Oplopenone	Terpenoids	28305-60-4	1606	437527	876743	288853	268420	300232	438013	738539	598245	668392	741963	807027	774495	631042	683953	610470	498250	606748	-	-
D319	119	93	222.198	C15H26O	.beta.-Acorenol	Terpenoids	28400-11-5	1649	3.33749e+06	6.22033e+06	3.01049e+06	823031	1.09169e+06	2.03259e+06	2.68798e+06	2.05255e+06	2.37027e+06	2.44594e+06	2.29998e+06	2.37296e+06	6.32092e+06	6.78747e+06	6.03441e+06	4.89499e+06	5.65028e+06	-	-
D322	94	79	218.167	C15H22O	(3S,3aR,6R,8aS)-3,7,7-Trimethyl-8-methylenehexahydro-1H-3a,6-methanoazulen-2(3H)-one	Terpenoids	28624-27-3	1669	110024	260346	68264.8	713171	737773	864841	2.0865e+06	1.71588e+06	1.90119e+06	2.20296e+06	2.1869e+06	2.19493e+06	1.33047e+06	1.44199e+06	1.30174e+06	1.04218e+06	1.25126e+06	-	-
D325	121	93	218.167	C15H22O	(3R,3aR,7S,8aS)-3,6,8,8-Tetramethyl-4,7,8,8a-tetrahydro-1H-3a,7-methanoazulen-2(3H)-one	Terpenoids	288249-25-2	1640	2.50752e+06	4.6986e+06	2.25177e+06	410632	496682	889851	1.15574e+06	976722	1.06623e+06	1.16189e+06	1.06702e+06	1.11446e+06	4.50508e+06	4.87604e+06	4.33409e+06	3.50093e+06	4.04612e+06	-	-
D328	134	91	202.172	C15H22	(5R,10R)-10-Methyl-6-methylene-2-(propan-2-ylidene)spiro[4.5]dec-7-ene	Terpenoids	28908-27-2	1495	5.66718e+06	1.16612e+07	3.33079e+06	735538	520095	210160	247629	325600	286615	460954	143662	302308	7.73959e+06	8.00333e+06	6.58645e+06	5.66262e+06	6.29385e+06	-	-
D329	79	81	152.12	C10H16O	Myroxide	Terpenoids	28977-57-3	1141	166749	167745	139254	1.08153e+07	5.49218e+06	3.10226e+06	1.59664e+06	2.14392e+06	1.87028e+06	3.27791e+06	3.477e+06	3.37745e+06	2.27101e+06	2.43827e+06	2.37491e+06	2.22076e+06	2.18742e+06	-	-
D337	205	220	220.183	C15H24O	2H-2a,7-Methanoazuleno[5,6-b]oxirene, octahydro-3,6,6,7a-tetramethyl-	Terpenoids	29597-36-2	1585	120891	238431	86002.6	108968	147852	64598.4	59650.4	23061.7	41356.1	36402.6	39313.5	37858	170045	186470	199779	154169	196230	-	-
D338	119	204	204.188	C15H24	1-methyl-4-(1,2,2-trimethylcyclopentyl)cyclohexa-1,3-diene	Terpenoids	29621-78-1	1509	2.76224e+06	8.05521e+06	1.27933e+06	4.95045e+06	3.06641e+06	1.76066e+06	704349	256497	480423	474044	528365	501204	5.66355e+06	5.87679e+06	5.06166e+06	4.10485e+06	4.81045e+06	-	-
D339	93	41	204.188	C15H24	cis-.alpha.-Bisabolene	Terpenoids	29837-07-8	1504	5.23537e+06	1.46028e+07	2.23655e+06	3.60233e+06	2.77814e+06	1.56406e+06	1.29162e+06	459766	875691	662892	869775	766334	1.03005e+07	1.08626e+07	9.17715e+06	7.52926e+06	8.47234e+06	-	-
D341	81	41	204.188	C15H24	Naphthalene, decahydro-1,6-bis(methylene)-4-(1-methylethyl)-, (4.alpha.,4a.alpha.,8a.alpha.)-	Terpenoids	30021-46-6	1459	656497	1.71859e+06	362007	1.54265e+07	1.41139e+07	8.29399e+06	1.38345e+07	1.01971e+07	1.20158e+07	1.17933e+07	1.34966e+07	1.2645e+07	6.4587e+06	6.38736e+06	5.50384e+06	4.52254e+06	5.4927e+06	-	-
D342	121	79	136.125	C10H16	2,4,6-Octatriene, 2,6-dimethyl-, (E,E)-	Terpenoids	3016-19-1	1144	82603.7	85447.1	55929.9	4.55687e+06	2.29131e+06	1.42117e+06	2.03747e+06	2.72936e+06	2.38341e+06	3.8841e+06	4.22347e+06	4.05378e+06	744557	821221	856159	812748	817597	-	-
D353	161	91	204.188	C15H24	(S,1Z,6Z)-8-Isopropyl-1-methyl-5-methylenecyclodeca-1,6-diene	Terpenoids	317819-80-0	1448	719282	1.25972e+06	290661	1.16833e+07	1.03075e+07	5.26055e+06	7.86934e+06	3.77189e+06	5.82061e+06	5.83467e+06	8.08239e+06	6.95853e+06	4.04485e+06	3.87714e+06	3.57003e+06	2.69862e+06	3.47131e+06	-	-
D369	126	108	222.198	C15H26O	Kessane	Terpenoids	3321-66-2	1537	3.48528e+06	6.1892e+06	1.88635e+06	1.4101e+07	2.64729e+07	1.21285e+07	1.50604e+07	51030.7	7.5557e+06	1.64352e+06	902740	1.27313e+06	8.34755e+06	8.66433e+06	7.44555e+06	6.04068e+06	7.41566e+06	-	-
D374	55	41	138.141	C10H18	(-)-trans-Pinane	Terpenoids	33626-25-4	972	4597.45	7937.41	3298.86	1.85778e+06	1.17168e+06	1.47926e+06	462134	495067	478600	811621	799138	805380	476725	631921	461176	382378	443349	-	-
D386	121	105	218.167	C15H22O	Squamulosone	Terpenoids	34413-94-0	1771				32600.6	36874.6	12823.3	20562.3	8354.95	14458.6	21216	19093.6	20154.8	9029.57	12176.6	13484.6	11202.4	12505.7	-	-
D406	85	41	152.12	C10H16O	2,7-Octadien-4-ol, 2-methyl-6-methylene-, (S)-	Terpenoids	35628-00-3	1147	5354.7	5349.32	6153.53	67647.4	28235.9	52478.5	46940.6	105914	76427.5	192112	220110	206111	63627.6	74080.1	63552.4	60643.4	57806.7	-	-
D408	81	96	172.146	C10H20O2	(1Alpha,3beta,4beta)-p-menthane-3,8-diol	Terpenoids	3564-95-2	1355	394808	577442	246126	6.92797e+06	2.92684e+06	5.32379e+06	1.95608e+07	2.16523e+07	2.06065e+07	2.49614e+07	2.83196e+07	2.66405e+07	6.14761e+06	6.51871e+06	5.86751e+06	5.00319e+06	5.40689e+06	-	-
D412	95	67	152.12	C10H16O	5,7-Octadien-4-one, 2,6-dimethyl-, (Z)-	Terpenoids	3588-18-9	1155	76924.7	22606.3	11149.6	3.75789e+06	1.63626e+06	2.41609e+06	743485	1.11353e+06	928506	1.41612e+06	1.69404e+06	1.55508e+06	5.7109e+07	6.00377e+07	5.48079e+07	5.08206e+07	4.93162e+07	-	-
D428	119	91	220.183	C15H24O	6-Methyl-2-(4-methylcyclohex-3-en-1-yl)hepta-1,5-dien-4-ol	Terpenoids	38142-56-2	1608	147963	284057	109317	450860	972422	388584	610978	6021.39	308500	59070.2	48947.7	54009	301560	340023	303590	234841	274183	-	-
D429	119	120	218.167	C15H22O	2-Methyl-6-(p-tolyl)hept-2-en-4-ol	Terpenoids	38142-57-3	1583	1.49155e+06	3.24774e+06	987444	1.35444e+06	1.65104e+06	1.18277e+06	2.21368e+06	1.51323e+06	1.86345e+06	1.94862e+06	2.11351e+06	2.03107e+06	2.3969e+06	2.55797e+06	2.22816e+06	1.81662e+06	2.21782e+06	-	-
D439	71	98	156.151	C10H20O	Cyclohexanol, 1-methyl-4-(1-methylethyl)-, trans-	Terpenoids	3901-93-7	1167	170406	191306	452456	4.62693e+06	2.61228e+06	2.11494e+06	5.45122e+06	6.37483e+06	5.91302e+06	6.76734e+06	7.50505e+06	7.1362e+06	2.24275e+06	2.40362e+06	2.37168e+06	2.17001e+06	2.10629e+06	-	-
D440	71	98	156.151	C10H20O	Cyclohexanol, 1-methyl-4-(1-methylethyl)-, cis-	Terpenoids	3901-95-9	1138				217279	76196.6	48143.3	6742.08	3088.51	4915.29				33960.1	40304.5	41729.3	38513.5	39165	-	-
D452	109	67	166.099	C10H14O2	Carvone oxide, trans-	Terpenoids	39903-97-4	1263	1.95271e+07	2.73737e+07	1.11854e+07	4.48552e+06	3.81245e+07	2.28793e+07	2.88009e+07	317006	1.45589e+07	878028	573603	725816	2.4725e+07	2.64021e+07	2.28424e+07	1.99473e+07	2.12112e+07	-	-
GMW0078	69	93	204.188	C15H24	.beta.-Bisabolene	Terpenoids	495-61-4	1509	318744	955442	131089	230015	180239	108492	61221.7	32873.1	47047.4	37157.3	41950.2	39553.8	559898	587578	487450	395443	451490	C16775	ko00909
KMW0148	93	91	136.125	C10H16	.alpha.-Pinene	Terpenoids	80-56-8	937	228492	407654	115622	9.58433e+07	3.91398e+07	7.09996e+07	7.75052e+07	8.41482e+07	8.08267e+07	1.04071e+08	1.48302e+08	1.26187e+08	3.82955e+07	4.9437e+07	3.66346e+07	2.97049e+07	3.61972e+07	C09880	ko00903,ko01110
KMW0172	93	121	136.125	C10H16	Camphene	Terpenoids	79-92-5	953	29128.6	46074.6	13522.4	7.52869e+06	3.55782e+06	4.6317e+06	4.34084e+06	4.60615e+06	4.4735e+06	6.48307e+06	8.63277e+06	7.55792e+06	6.47232e+06	8.5994e+06	6.42978e+06	5.29631e+06	6.28793e+06	C06076	-
KMW0178	93	91	136.125	C10H16	Bicyclo[3.1.0]hexane, 4-methylene-1-(1-methylethyl)-	Terpenoids	3387-41-5	972	576291	1.12681e+06	266059	2.00319e+08	1.32295e+08	1.59474e+08	5.21751e+07	5.25767e+07	5.23759e+07	8.63965e+07	8.56206e+07	8.60085e+07	5.1666e+07	6.8859e+07	5.1582e+07	4.28623e+07	4.97975e+07	C16777	-
KMW0181	109	79	152.12	C10H16O	2,3-Dehydro-1,8-cineole	Terpenoids	92760-25-3	992	222357	221258	214868	179720	272883	223200	362742	367936	365339	381858	436944	409401	199626	237910	230372	203435	226670	-	-
KMW0193	93	41	136.125	C10H16	.beta.-Pinene	Terpenoids	127-91-3	981	193118	367632	89411.3	4.57678e+07	1.60464e+07	3.3409e+07	3.89256e+07	4.37381e+07	4.13319e+07	5.81052e+07	7.35254e+07	6.58153e+07	1.16668e+07	1.56411e+07	1.17692e+07	1.02776e+07	1.11908e+07	C09882	-
KMW0198	93	91	136.125	C10H16	.alpha.-Phellandrene 1	Terpenoids	99-83-2	1006	540933	686628	261273	3.18126e+07	1.41864e+07	7.76801e+06	6.74696e+06	8.933e+06	7.83998e+06	1.21171e+07	1.25466e+07	1.23318e+07	4.60108e+06	4.97181e+06	4.74451e+06	3.98227e+06	4.12193e+06	C11391	-
KMW0199	41	93	136.125	C10H16	.beta.-Myrcene	Terpenoids	123-35-3	991	1.00456e+07	1.37265e+07	5.63844e+06	4.85541e+06	1.80706e+07	1.34889e+07	2.21016e+07	1.17382e+07	1.69199e+07	1.46181e+07	1.90054e+07	1.68118e+07	1.2043e+07	1.41327e+07	1.25089e+07	1.08633e+07	1.17948e+07	C06074	ko00902,ko01110
KMW0210	161	105	204.188	C15H24	1H-Cyclopenta[1,3]cyclopropa[1,2]benzene, octahydro-7-methyl-3-methylene-4-(1-methylethyl)-, [3aS-(3a.alpha.,3b.beta.,4.beta.,7.alpha.,7aS*)]-	Terpenoids	13744-15-5	1390	2.77452e+06	6.27033e+06	1.403e+06	947151	923872	521500	465376	162766	314071	208733	300281	254507	4.43121e+06	4.37522e+06	3.7789e+06	3.15727e+06	3.81624e+06	C09648	-
KMW0217	68	93	136.125	C10H16	D-Limonene	Terpenoids	5989-27-5	1030	4.28257e+06	5.70427e+06	2.63738e+06	2.58929e+07	1.50749e+07	2.32977e+07	4.43465e+07	4.58384e+07	4.50924e+07	5.09665e+07	5.60494e+07	5.35079e+07	2.30934e+07	2.68794e+07	2.33171e+07	2.07261e+07	2.08105e+07	C06099	ko00902,ko00903,ko01100,ko01110
KMW0218	154	81	154.136	C10H18O	Eucalyptol	Terpenoids	470-82-6	1030	2.9952e+06	3.56716e+06	2.47405e+06	5.71476e+07	1.98687e+07	4.88225e+07	1.12628e+08	1.2469e+08	1.18659e+08	1.33696e+08	1.45027e+08	139361723	5.4092e+07	6.18719e+07	5.39665e+07	4.94698e+07	4.72739e+07	C09844	ko00902,ko01110
KMW0220	93	91	136.125	C10H16	3-Carene	Terpenoids	13466-78-9	1009	520070	686628	329253	3.20286e+07	1.40714e+07	7.94946e+06	7.1772e+06	9.03492e+06	8.10606e+06	1.23405e+07	1.28071e+07	1.25738e+07	4.56009e+06	5.24846e+06	4.69146e+06	3.94849e+06	4.0906e+06	-	-
KMW0223	121	93	136.125	C10H16	1,3-Cyclohexadiene, 1-methyl-4-(1-methylethyl)-	Terpenoids	99-86-5	1012	754818	1.0121e+06	444714	2.98243e+07	1.23696e+07	1.2116e+07	1.52066e+07	1.45889e+07	1.48977e+07	1.99357e+07	2.36603e+07	2.1798e+07	5.54674e+06	6.59766e+06	5.7509e+06	4.69821e+06	4.86072e+06	C09898	-
KMW0235	93	41	136.125	C10H16	1,3,6-Octatriene, 3,7-dimethyl-, (Z)-	Terpenoids	3338-55-4	1038	1.13369e+07	1.62503e+07	6.13313e+06		2.32543e+07	1.31018e+07	1.14022e+07						1.29355e+07	1.54819e+07	1.41707e+07	1.24105e+07	1.32465e+07	-	-
KMW0247	93	77	136.125	C10H16	.beta.-Phellandrene	Terpenoids	555-10-2	1031	6.05195e+06	7.72038e+06	3.59102e+06	1.39305e+08	7.3561e+07	8.38069e+07	1.09729e+08	1.17272e+08	1.135e+08	1.42756e+08	1.50104e+08	1.4643e+08	5.5852e+07	6.57859e+07	5.48369e+07	4.89491e+07	5.00877e+07	C19818	-
KMW0250	59	41	156.151	C10H20O	7-Octen-2-ol, 2,6-dimethyl-	Terpenoids	18479-58-8	1064	3048.54	3133.42	2115.72	14092.7	13526.8	13150.5	101176	93134.9	97155.5	29259.8	25998.8	27629.3	99792.7	114751	88345.4	67328.7	61359.8	-	-
KMW0252	93	41	136.125	C10H16	1,3,7-Octatriene, 3,7-dimethyl-	Terpenoids	502-99-8	1048	1.59463e+07	2.26268e+07	8.80994e+06	449230	3.19181e+07	1.78097e+07	2.5e+07	330531	1.26652e+07	518249	493125	505687	1.76726e+07	2.10028e+07	1.93549e+07	1.70455e+07	1.81494e+07	-	-
KMW0254	83	55	152.12	C10H16O	1,5-Heptadien-4-one, 3,3,6-trimethyl-	Terpenoids	546-49-6	1062	225474	217501	203913	210361	222715	230026	181993	187785	184889	208698	217278	212988	182378	194777	195449	216956	201037	-	-
KMW0259	93	91	136.125	C10H16	.gamma.-Terpinene	Terpenoids	99-85-4	1060	668923	943195	370442	3.61835e+07	1.7434e+07	2.2551e+07	2.89446e+07	3.17078e+07	3.03262e+07	4.25594e+07	5.08867e+07	4.67231e+07	7.49466e+06	8.91016e+06	8.63985e+06	7.42487e+06	8.69018e+06	C09900	-
KMW0291	71	93	154.136	C10H18O	Linalool	Terpenoids	78-70-6	1099	7.60994e+07	8.04145e+07	5.91425e+07	3.80357e+06	1.44574e+08	7.53249e+07	1.03e+08	6.48398e+06	5.47419e+07	5.2966e+06	4.92739e+06	5.11199e+06	8.17849e+07	8.96084e+07	8.27163e+07	7.51986e+07	7.23837e+07	C03985	-
KMW0304	119	91	134.11	C10H14	1,3,8-p-Menthatriene	Terpenoids	18368-95-1	1119	213129	210731	230433	3.293e+06	2.04072e+06	1.68679e+06	541096	530468	535782	940518	589888	765203	1.72358e+06	1.78773e+06	1.55787e+06	1.45543e+06	1.42364e+06	-	-
KMW0312	69	81	150.104	C10H14O	Furan, 3-(4-methyl-3-pentenyl)-	Terpenoids	539-52-6	1101	2.85125e+07	3.01531e+07	2.23948e+07	1.57253e+06	5.33579e+07	2.95198e+07	3.85262e+07	2.83889e+06	2.06825e+07	2.48999e+06	2.37396e+06	2.43198e+06	3.044e+07	3.32815e+07	3.05481e+07	2.77192e+07	2.66902e+07	-	-
KMW0319	137	67	152.12	C10H16O	7-Oxabicyclo[4.1.0]heptane, 1-methyl-4-(1-methylethenyl)-	Terpenoids	1195-92-2	1133	153063	196599	91642.4	1.9881e+07	1.22898e+07	1.02193e+07	1.96694e+06	1.12682e+06	1.54688e+06	3.61969e+06	1.07618e+06	2.34794e+06	9.27355e+06	9.95236e+06	8.8608e+06	8.22316e+06	7.97888e+06	C07271	ko00903
KMW0324	137	109	152.12	C10H16O	Limonene oxide, cis-	Terpenoids	13837-75-7	1134	150041	194221	89925.4	1.98429e+07	1.22578e+07	1.02193e+07	1.68934e+06	898957	1.29415e+06	2.87745e+06	925186	1.90132e+06	9.2588e+06	9.9394e+06	8.84747e+06	8.21024e+06	7.96471e+06	-	-
KMW0325	81	43	154.136	C10H18O	3-Cyclohexen-1-ol, 1-methyl-4-(1-methylethyl)-	Terpenoids	586-82-3	1137	119484	131677	92656.5	1.24425e+07	6.15998e+06	3.45769e+06	1.62343e+06	2.12344e+06	1.87343e+06	3.28995e+06	3.33822e+06	3.31409e+06	2.21909e+06	2.47031e+06	2.50922e+06	2.36335e+06	2.30816e+06	-	-
KMW0327	108	67	152.12	C10H16O	Limonene oxide, trans-	Terpenoids	4959-35-7	1138	32809.9	30590.6	28264.7	1.52459e+06	760753	466725	254852	378946	316899	574279	621946	598113	320741	309229	303947	294019	293243	-	-
KMW0329	95	41	152.12	C10H16O	Camphor	Terpenoids	76-22-2	1145	54981.2	54222.3	43900.3	7.78143e+06	3.8022e+06	2.12571e+06	992732	1.29684e+06	1.14478e+06	2.01711e+06	2.00489e+06	2.011e+06	1.36592e+06	1.51594e+06	1.4962e+06	1.41481e+06	1.37606e+06	C00809	-
KMW0334	112	69	154.136	C10H18O	Cyclohexanone, 5-methyl-2-(1-methylethyl)-	Terpenoids	10458-14-7	1169	4611.92	3095	3543.42	581347	428246	315287	917305	853494	885399	906692	982284	944488	570458	605368	597708	548723	541726	-	-
KMW0342	154	95	154.136	C10H18O	Citronellal	Terpenoids	106-23-0	1153	13368.9	8626.79	6925.48	1.07185e+06	594839	670166	105212	160068	132640	183842	221557	202700	6.79176e+06	7.06232e+06	6.40911e+06	6.0427e+06	5.80818e+06	C17384	-
KMW0360	71	81	156.151	C10H20O	Levomenthol	Terpenoids	2216-51-5	1171	151049	186078	453810	4.62693e+06	2.61228e+06	2.12551e+06	5.47753e+06	6.37483e+06	5.92618e+06	6.76734e+06	7.50505e+06	7.1362e+06	2.25027e+06	2.41019e+06	2.37508e+06	2.17522e+06	2.11166e+06	C00400	ko00902,ko01110
KMW0362	95	41	154.136	C10H18O	Isoborneol	Terpenoids	124-76-5	1157	77317.2	22417.6	11149.6	3.52324e+06	1.52479e+06	2.311e+06	1.07822e+06	1.68225e+06	1.38023e+06	1.41507e+06	1.62767e+06	1.52137e+06	5.6968e+07	5.99002e+07	5.46694e+07	5.0682e+07	4.91856e+07	C01411	-
KMW0370	95	107	168.151	C11H20O	2-Methylisoborneol	Terpenoids	2371-42-8	1198	861534	1.20754e+06	1.13334e+06	1.36334e+06	1.38562e+06	1.08981e+06	3.65584e+06	4.60168e+06	4.12876e+06	4.81198e+06	5.49247e+06	5.15222e+06	1.93978e+06	2.05214e+06	1.94578e+06	1.91121e+06	1.873e+06	C20243	-
KMW0374	69	41	154.136	C10H18O	4-Hexen-1-ol, 5-methyl-2-(1-methylethenyl)-, (R)-	Terpenoids	498-16-8	1170	145645	155172	343551	8.35492e+06	7.45987e+06	5.60763e+06	1.22083e+07	9.39732e+06	1.08028e+07	1.01834e+07	1.09751e+07	1.05792e+07	9.52871e+06	1.03079e+07	1.03788e+07	9.65365e+06	9.47362e+06	-	-
KMW0385	93	107	154.136	C10H18O	2-methyl-5-(1-methylethenyl)-Cyclohexanol	Terpenoids	619-01-2	1196	2.80886e+06	4.18001e+06	3.96891e+06	6.23744e+06	4.7707e+06	4.10776e+06	1.59937e+07	2.09104e+07	1.8452e+07	2.14646e+07	2.43903e+07	2.29275e+07	8.36937e+06	8.74267e+06	8.62507e+06	7.97736e+06	7.7551e+06	C18017	-
KMW0386	67	95	152.12	C10H16O	cis-Dihydrocarvone	Terpenoids	3792-53-8	1195	490128	777424	702226	1304124	1050859	814872	3263805	4302502	3.78315e+06	4364166	4957287	4.66073e+06	1913052	1998910	1867098	1726858	1645161	-	-
KMW0388	119	91	152.12	C10H16O	Carveol	Terpenoids	99-48-9	1219	10709.8	17589.3	11360.3	292271	117272	150108	192525	259755	226140	330255	377010	353632	121964	118635	107778	93462.8	121035	-	-
KMW0389	95	110	154.136	C10H18O	endo-Borneol	Terpenoids	507-70-0	1167	156000	108049	71506	1.23409e+08	5.76989e+07	4.62366e+07	1.3996e+08	1.72504e+08	1.56232e+08	1.81537e+08	1.97658e+08	1.89598e+08	4.3058e+07	4.5066e+07	4.28525e+07	3.94912e+07	3.81535e+07	C01411	-
KMW0408	135	91	150.104	C10H14O	Benzenemethanol, .alpha.,.alpha.,4-trimethyl-	Terpenoids	1197-01-9	1183	1192.53	2297.53	435.522	109878	54568.6	68124.7	100898	144733	122815	181380	205623	193502	52176.7	48822.7	48401.1	45450.6	45512.2	-	-
KMW0413	82	54	150.104	C10H14O	(-)-Carvone	Terpenoids	6485-40-1	1254	1.79169e+07	2.53791e+07	1.02573e+07	1.12283e+07	3.60663e+07	2.13802e+07	2.69309e+07	877797	1.39043e+07	2.29446e+06	1.59034e+06	1.9424e+06	2.34428e+07	2.51132e+07	2.15084e+07	1.90025e+07	1.99135e+07	C01767	ko00902,ko00903,ko01110
KMW0428	82	110	152.12	C10H16O	2-Cyclohexen-1-one, 3-methyl-6-(1-methylethyl)-	Terpenoids	89-81-6	1253	1.79169e+07	2.53791e+07	1.02573e+07	1.12107e+07	3.58463e+07	2.13651e+07	2.69217e+07	875767	1.38987e+07	2.29109e+06	1.58915e+06	1.94012e+06	2.34266e+07	2.51205e+07	2.14948e+07	1.90003e+07	1.99094e+07	-	-
KMW0432	41	69	152.12	C10H16O	2,6-Octadienal, 3,7-dimethyl-, (Z)-	Terpenoids	106-26-3	1240	144305	193031	192160	1.24065e+06	627515	526174	451380	685738	568559	1.03389e+06	968188	1.00104e+06	293319	314508	331609	265473	298902	C09847	ko01110
KMW0434	41	137	152.12	C10H16O	2,6,6-trimethyl-1-Cyclohexene-1-carboxaldehyde	Terpenoids	432-25-7	1220	16039.9	17056.8	16774.3	247375	89402.5	143732	304810	322358	313584	388339	468478	428408	99131.8	116372	111118	100585	101366	C20425	-
KMW0444	82	54	150.104	C10H14O	Carvone	Terpenoids	99-49-0	1242	379695	439087	520835	886819	642586	547450	525502	589652	557577	759262	748325	753793	501976	456259	505646	371288	406642	-	-
KMW0446	69	41	152.12	C10H16O	Citral	Terpenoids	5392-40-5	1273	143531	310833	131940	191010	356016	209988	443465	287126	365296	309812	322565	316189	258122	277266	257708	212997	221603	C01499	ko01110
KMW0452	133	105	148.089	C10H12O	4-(1-methylethyl)-Benzaldehyde	Terpenoids	122-03-2	1239	8554.23	6701.93	7241.7	1574467	720784	842398	218175	270905	244540	413432	238983	326208	380686	393441	389099	350437	369774	C06577	ko01100
KMW0453	93	80	196.146	C12H20O2	Linalyl acetate	Terpenoids	115-95-7	1257	5.56511e+08	7.63365e+08	3.29786e+08	670386	1.01076e+09	6.30399e+08	7.96912e+08	9.19368e+06	4.03053e+08	1.69805e+07	8.52669e+06	1.27536e+07	6.77157e+08	7.10633e+08	6.29048e+08	5.60909e+08	5.94152e+08	C09863	-
KMW0459	41	69	152.12	C10H16O	2,6-Octadienal, 3,7-dimethyl-, (E)-	Terpenoids	141-27-5	1270	5.21624e+07	7.33121e+07	2.99545e+07		9.85884e+07	5.84718e+07	7.61981e+07						6.48712e+07	7.00156e+07	5.84379e+07	5.18891e+07	5.41409e+07	C01499	ko01110
KMW0478	41	69	204.188	C15H24	cis-.beta.-Farnesene	Terpenoids	28973-97-9	1444	188706	318794	77893.3	3.21447e+06	2.83223e+06	1.47072e+06	2.18957e+06	1.06951e+06	1.62954e+06	1.63988e+06	2.25174e+06	1.94581e+06	1.16026e+06	1.1202e+06	1.0148e+06	768650	986563	-	-
KMW0509	121	93	204.188	C15H24	Cyclohexene, 4-ethenyl-4-methyl-3-(1-methylethenyl)-1-(1-methylethyl)-, (3R-trans)-	Terpenoids	20307-84-0	1338	342305	950408	165859	2.2496e+07	1.41915e+07	6.82839e+06	1.98834e+06	905374	1.44686e+06	2.88578e+06	1.96754e+06	2.42666e+06	4.61442e+06	5.16396e+06	4.66025e+06	3.89685e+06	4.28213e+06	-	-
KMW0522	161	119	204.188	C15H24	Copaene	Terpenoids	3856-25-5	1376	49848.4	102237	24941.3	131767	236328	113822	122659	3257.07	62958.1	15703.3	9764.03	12733.6	110567	104134	95013.2	79308.3	94291.8	C09639	-
KMW0526	69	121	190.136	C13H18O	2-Buten-1-one, 1-(2,6,6-trimethyl-1,3-cyclohexadien-1-yl)-, (E)-	Terpenoids	23726-93-4	1386	1.50703e+07	2.21636e+07	8.26153e+06	214940	3.19461e+07	1.71937e+07	2.37494e+07	267301	1.20083e+07	452701	349292	400996	1.79005e+07	2.04922e+07	1.87524e+07	1.64497e+07	1.77501e+07	-	-
KMW0530	69	41	196.146	C12H20O2	Geranyl acetate	Terpenoids	105-87-3	1382	1.50658e+07	2.21983e+07	8.29025e+06	207801	3.19106e+07	1.71501e+07	2.37161e+07	261863	1.1989e+07	453023	366538	409781	1.78847e+07	2.04702e+07	1.87311e+07	1.64316e+07	1.7732e+07	C09861	-
KMW0537	81	68	204.188	C15H24	Cyclohexane, 1-ethenyl-1-methyl-2,4-bis(1-methylethenyl)-, (1.alpha.,2.beta.,4.beta.)-	Terpenoids	33880-83-0	1398	1.56014e+06	2.36188e+06	1.21666e+06	3.86832e+06	4.34913e+06	2.0956e+06	2.08455e+06	292759	1.18865e+06	397020	413881	405451	1.90001e+06	1.85644e+06	1.73083e+06	1.41966e+06	1.78061e+06	C17094	-
KMW0548	204	161	204.188	C15H24	[1aR-(1a.alpha.,4.alpha.,4a.beta.,7b.alpha.)]-1a,2,3,4,4a,5,6,7b-octahydro-1,1,4,7-tetramethyl-1H-Cycloprop[e]azulene	Terpenoids	489-40-7	1409	399881	453445	165343	217041	562411	251334	52733.2	76217.7	64475.4	94158.6	225381	159770	439672	397349	377394	278814	374581	C19734	-
KMW0552	81	80	204.188	C15H24	(-)-.beta.-Bourbonene	Terpenoids	5208-59-3	1384	1.61569e+06	2.73458e+06	870863	203390	2.785e+06	1.52193e+06	2.09975e+06	97957.5	1.09886e+06	128882	126262	127572	2.21729e+06	2.42337e+06	2.16959e+06	1.8739e+06	2.09738e+06	-	-
KMW0555	119	93	204.188	C15H24	trans-.alpha.-Bergamotene	Terpenoids	13474-59-4	1435	1.19834e+07	2.50931e+07	6.5742e+06	8.10036e+06	5.38493e+06	5.45281e+06	7.80333e+06	6.47718e+06	7.14025e+06	7.453e+06	9.59173e+06	8.52236e+06	1.87977e+07	1.92936e+07	1.61958e+07	1.40965e+07	1.61665e+07	C20811	-
KMW0556	41	105	204.188	C15H24	Naphthalene, decahydro-4a-methyl-1-methylene-7-(1-methylethenyl)-, [4aR-(4a.alpha.,7.alpha.,8a.beta.)]-	Terpenoids	17066-67-0	1486	763379	1.58497e+06	267001	1.4457e+07	1.38314e+07	8.44842e+06	1.1241e+07	4.82924e+06	8.03513e+06	7.08384e+06	9.0602e+06	8.07202e+06	6.48557e+06	6.30247e+06	5.84881e+06	4.63163e+06	5.35651e+06	C09723	ko00909,ko01110
KMW0559	41	93	204.188	C15H24	Bicyclo[7.2.0]undec-4-ene, 4,11,11-trimethyl-8-methylene-,[1R-(1R*,4Z,9S*)]-	Terpenoids	118-65-0	1406				53478.3	35440.8	19259.5		1902.49					82920.9	92375.8	78138.7	55762.7	57950.7	C09691	-
KMW0566	189	133	204.188	C15H24	(4aR-trans)-decahydro-4a-methyl-1-methylene-7-(1-methylethylidene)-Naphthalene	Terpenoids	515-17-3	1479	5.34552e+06	8.72528e+06	2.47242e+06	9.0569e+06	8.99576e+06	5.47166e+06	8.94271e+06	5.41311e+06	7.17791e+06	5.31084e+06	7.92316e+06	6.617e+06	1.18299e+07	1.15199e+07	1.05542e+07	8.20549e+06	9.84858e+06	C21707	-
KMW0573	41	69	204.188	C15H24	(E)-.beta.-Famesene	Terpenoids	18794-84-8	1457	670626	1.7343e+06	349483	1.59539e+07	1.48982e+07	8.89855e+06	1.44157e+07	1.09258e+07	1.26707e+07	1.24683e+07	1.41595e+07	1.33139e+07	6.94943e+06	6.86146e+06	5.90166e+06	4.88137e+06	5.891e+06	C09666	ko00909
KMW0576	41	161	204.188	C15H24	Aromandendrene	Terpenoids	489-39-4	1440	113500	272761	60909.5										200616	203892	173271	141669	175312	-	-
KMW0583	177	91	192.151	C13H20O	trans-.beta.-Ionone	Terpenoids	79-77-6	1486	19269.8	33498.5	8511.83	43328.6	42974.3	24508.9	38592.9	19121.6	28857.2	22937.6	32158.1	27547.9	44553.4	43294.8	41749.4	32065.8	40067.5	C12287	-
KMW0589	93	80	204.188	C15H24	Humulene	Terpenoids	6753-98-6	1454	2.12542e+06	5.34204e+06	1.1473e+06	5.36333e+07	4.90095e+07	2.89366e+07	4.79321e+07	3.52475e+07	4.15898e+07	4.08215e+07	4.67731e+07	4.37973e+07	2.20923e+07	2.1718e+07	1.87933e+07	1.54574e+07	1.8807e+07	C09684	ko00909
KMW0595	119	93	204.188	C15H24	1,3-Cyclohexadiene, 5-(1,5-dimethyl-4-hexenyl)-2-methyl-, [S-(R*,S*)]-	Terpenoids	495-60-3	1495	5.2423e+07	1.04854e+08	2.89002e+07	5.96706e+06	3.6721e+06	1.50827e+06	1.11065e+06	330614	720633	452813	904877	678845	7.06765e+07	7.36076e+07	5.98728e+07	5.16072e+07	5.8173e+07	C09750	-
KMW0597	161	105	204.188	C15H24	.gamma.-Muurolene	Terpenoids	30021-74-0	1477	4956863	10462334	2596893	596345	315313	152740	108358	51409.5	79883.9	58620.9	143496	101059	6622945	6717407	6046453	4906387	5760035	-	-
KMW0603	161	105	204.188	C15H24	Germacrene D	Terpenoids	23986-74-5	1481	4.98534e+06	1.02218e+07	2.37482e+06	3.12652e+07	3.10858e+07	1.75049e+07	2.47214e+07	8.26787e+06	1.64946e+07	1.26007e+07	1.71338e+07	1.48673e+07	1.63768e+07	1.65831e+07	1.49151e+07	1.19e+07	1.31031e+07	C16142	ko00909
KMW0604	121	93	204.188	C15H24	(1S,2E,6E,10R)-3,7,11,11-Tetramethylbicyclo[8.1.0]undeca-2,6-diene	Terpenoids	24703-35-3	1495	8.35028e+06	1.69655e+07	4.94863e+06	1.10578e+06	724267	343319	458530	258069	358299	78804.6	205557	142181	1.12847e+07	1.17216e+07	9.57034e+06	8.26322e+06	9.20868e+06	-	-
KMW0606	105	161	204.188	C15H24	.alpha.-Muurolene	Terpenoids	10208-80-7	1499	7.69778e+07	1.53208e+08	4.39464e+07	9.8992e+06	5.88517e+06	1.90884e+06	1.54709e+06	535488	1.04129e+06	593100	1.42192e+06	1.00751e+06	1.04324e+08	1.0809e+08	8.85982e+07	7.68184e+07	8.58294e+07	C20272	-
KMW0613	41	93	204.188	C15H24	.alpha.-Farnesene	Terpenoids	502-61-4	1508	594080	1.66989e+06	264752	866445	541714	293961	132808	29000.1	80904.1	71962.1	92167.7	82064.9	1.28686e+06	1.31984e+06	1.12552e+06	927282	1.05265e+06	C09665	ko00909,ko01110
KMW0614	119	105	204.188	C15H24	Cubenene	Terpenoids	29837-12-5	1532	1.77377e+06	3.94155e+06	1.00903e+06	926510	892152	480199	686347	306073	496210	446234	622014	534124	2.56462e+06	2.64259e+06	2.42992e+06	1.90978e+06	2.19089e+06	-	-
KMW0616	161	105	204.188	C15H24	(1.alpha.,4a.beta.,8a.alpha.)-1,2,3,4,4a,5,6,8a-octahydro-7-methyl-4-methylene-1-(1-methylethyl)-Naphthalene	Terpenoids	39029-41-9	1513	485893	1.00879e+06	249782	2.03369e+06	2.37777e+06	1.30125e+06	1.53999e+06	469493	1.00474e+06	727279	943728	835503	1.16105e+06	1.14999e+06	1.02205e+06	827375	1.00578e+06	C19738	-
KMW0618	161	134	204.188	C15H24	Naphthalene, 1,2,3,5,6,8a-hexahydro-4,7-dimethyl-1-(1-methylethyl)-, (1S-cis)-	Terpenoids	483-76-1	1524	3.84665e+06	8.55675e+06	2.01148e+06	522376	398561	218843	412210	225292	318751	321543	446215	383879	5.48842e+06	5.70015e+06	4.93913e+06	4.09971e+06	4.73097e+06	C06394	ko00909,ko01100,ko01110
KMW0620	119	132	202.172	C15H22	Benzene, 1-(1,5-dimethyl-4-hexenyl)-4-methyl-	Terpenoids	644-30-4	1483	1.33332e+07	2.43774e+07	5.10576e+06	2.49431e+08	2.35699e+08	1.38654e+08	1.87856e+08	7.4894e+07	131374747	1.13153e+08	1.47854e+08	1.30503e+08	1.02076e+08	9.90687e+07	9.25487e+07	7.27783e+07	8.21971e+07	-	-
KMW0622	69	41	204.188	C15H24	Cyclohexene, 3-(1,5-dimethyl-4-hexenyl)-6-methylene-, [S-(R*,S*)]-	Terpenoids	20307-83-9	1524	118038	258764	58651.4	50283.1	109662	56187.7	76966	36576.7	56771.3	36432.6	52264.7	44348.6	168472	168677	149061	120450	139267	C16776	-
KMW0623	121	93	204.188	C15H24	1,5-Cyclodecadiene, 1,5-dimethyl-8-(1-methylethylidene)-, (E,E)-	Terpenoids	15423-57-1	1557	59554.5	150441	49061.7	3.77167e+06	6.36015e+06	2.59345e+06	3.43411e+06	43852.2	1.73898e+06	294877	249225	272051	1.44937e+06	1.62382e+06	1.45612e+06	1.07699e+06	1.22466e+06	C09672	ko00909
KMW0626	159	160	202.172	C15H22	Naphthalene, 1,2,3,4-tetrahydro-1,6-dimethyl-4-(1-methylethyl)-, (1S-cis)-	Terpenoids	483-77-2	1523	53378.6	102208	31120.1	5531.24	9867.35	6830.44	13781.2	8924.05	11352.6	9591.83	11573.3	10582.6	74217.7	73769.6	61322.4	54880.9	58927	-	-
KMW0630	69	41	222.198	C15H26O	1,6,10-Dodecatrien-3-ol, 3,7,11-trimethyl-, (E)-	Terpenoids	40716-66-3	1564	609387	1.29515e+06	395728	653969	924383	1.03179e+06	1.52698e+06	1.03309e+06	1.28003e+06	1.27424e+06	1.38162e+06	1.32793e+06	1.30417e+06	1.41627e+06	1.2564e+06	992845	1.22954e+06	-	-
KMW0639	123	41	208.146	C13H20O2	3-Buten-2-one, 4-(2,2,6-trimethyl-7-oxabicyclo[4.1.0]hept-1-yl)-	Terpenoids	23267-57-4	1473	228960	529040	109485	202393	154327	146410	215603	152989	184296	187547	253592	220570	386952	395616	333153	275852	335508	-	-
KMW0643	109	41	220.183	C15H24O	Caryophyllene oxide	Terpenoids	1139-30-6	1581	1.03042e+06	2.13515e+06	680962	459947	594977	662174	1.31647e+06	1.05984e+06	1.18815e+06	1.29926e+06	1.42191e+06	1.36058e+06	1.36361e+06	1.46122e+06	1.3207e+06	1.06739e+06	1.28235e+06	C16908	-
KMW0645	93	109	222.198	C15H26O	Levomenol	Terpenoids	23089-26-1	1695	209143	399329	160645	52659.1	337050	251393	293910	108540	201225	109758	94465.1	102111	319234	330778	259641	206872	262640	C09621	ko01100
KMW0652	119	41	222.198	C15H26O	Cubenol	Terpenoids	21284-22-0	1642	3.33749e+06	6.22033e+06	3.01049e+06	803936	1.0119e+06	2.0238e+06	2.68393e+06	2.03879e+06	2.36136e+06	2.42744e+06	2.28461e+06	2.35603e+06	6.31367e+06	6.77877e+06	6.02943e+06	4.89071e+06	5.64294e+06	-	-
KMW0655	135	59	222.198	C15H26O	5-Azulenemethanol, 1,2,3,3a,4,5,6,7-octahydro-.alpha.,.alpha.,3,8-tetramethyl-, [3S-(3.alpha.,3a.beta.,5.alpha.)]-	Terpenoids	22451-73-6	1667	159863	352778	138477	1.34607e+06	1.78206e+06	1.76856e+06	4.04467e+06	3.07636e+06	3.56051e+06	3.98934e+06	3.97292e+06	3.98113e+06	2.34124e+06	2.54524e+06	2.19631e+06	1.76108e+06	2.12748e+06	-	-
KMW0661	109	119	222.198	C15H26O	.alpha.-Bisabolol	Terpenoids	515-69-5	1684	306848	692779	251359	98871.1	664498	506882	663888	207261	435574	233112	186496	209804	544961	638250	584212	424005	527905	C09621	ko01100
KMW0664	82	93	222.198	C15H26O	3-Cyclohexen-1-ol, 1-(1,5-dimethyl-4-hexenyl)-4-methyl-	Terpenoids	15352-77-9	1671	74604.4	182026	55174.5	785260	889644	1.28905e+06	3.64217e+06	3.08101e+06	3.36159e+06	4.01307e+06	4.00093e+06	4.007e+06	2.10496e+06	2.3194e+06	2.12044e+06	1.6818e+06	2.02648e+06	-	-
KMW0671	69	119	222.198	C15H26O	(1R,4R)-1-methyl-4-(6-Methylhept-5-en-2-yl)cyclohex-2-enol	Terpenoids	58334-55-7	1616	59377.9	97314.1	44071.2	117158	275432	101740	145026	3086.1	74056.2	11497.5	10742.8	11120.1	71665.3	82963.6	73724.3	60043	68602.1	-	-
KMW0678	109	135	222.198	C15H26O	4,8-Methanoazulen-9-ol, decahydro-2,2,4,8-tetramethyl-, stereoisomer	Terpenoids	4586-22-5	1566	846655	1.74611e+06	518474	1.11402e+06	1.50967e+06	1.7842e+06	2.89658e+06	2.06286e+06	2.47972e+06	2.57554e+06	2.83058e+06	2.70306e+06	2.1325e+06	2.27984e+06	2.02934e+06	1.63906e+06	2.00507e+06	-	-
KMW0687	109	69	222.198	C15H26O	1H-Cycloprop[e]azulen-4-ol, decahydro-1,1,4,7-tetramethyl-, [1aR-(1a.alpha.,4.beta.,4a.beta.,7.alpha.,7a.beta.,7b.alpha.)]-	Terpenoids	552-02-3	1591	1.06638e+06	2.32871e+06	713192	525246	659656	728990	1.41171e+06	1.13678e+06	1.27424e+06	1.39296e+06	1.52413e+06	1.45854e+06	1.45981e+06	1.58095e+06	1.42148e+06	1.15721e+06	1.38878e+06	-	-
KMW0693	189	204	222.198	C15H26O	10-epi-.gamma.-Eudesmol	Terpenoids	15051-81-7	1619	328592	712011	245187	1.14524e+06	2.60333e+06	1.0528e+06	1.66849e+06	6238.47	837366	123394	79228.2	101311	740061	829208	751336	586154	680844	C19893	-
KMW0708	161	122	222.198	C15H26O	2-[(2S,4aR,8aR)-4a,8-dimethyl-2,3,4,5,6,8a-hexahydro-1H-naphthalen-2-yl]propan-2-ol	Terpenoids	123123-38-6	1658	2.21861e+07	4.33176e+07	2.04553e+07	3.78826e+06	4.75014e+06	9.33803e+06	1.25692e+07	9.39545e+06	1.09823e+07	1.12256e+07	1.05875e+07	1.09065e+07	3.9972e+07	4.35781e+07	3.92001e+07	3.17979e+07	3.67543e+07	C21689	-
NMW0003	93	55	218.167	C15H22O	2,6,9,11-Dodecatetraenal, 2,6,10-trimethyl-, (E,E,E)-	Terpenoids	17909-77-2	1752	34571	55600.6	28562.2	38384.3	50533.7	20252.1	32052.5	16714.9	24383.7	32106.1	36122.6	34114.4	30107.1	33981.7	32542.2	23157.1	39854.3	C09729	-
NMW0004	71	67	170.131	C10H18O2	1-methyl-4-(1-methylethenyl)-1,2-Cyclohexanediol	Terpenoids	1946-00-5	1321	52724	97608.9	25909.3	232439	147666	207846	845486	954616	900051	1.13105e+06	1.33762e+06	1.23433e+06	212882	232242	216273	183701	214747	C18020	-
NMW0015	68	93	136.125	C10H16	Cyclohexene, 1-methyl-4-(1-methylethenyl)-, (S)-	Terpenoids	5989-54-8	1029	4.28257e+06	5.70427e+06	2.63738e+06	2.58918e+07	1.58015e+07	2.36497e+07	4.44108e+07	4.58345e+07	4.51226e+07	5.09559e+07	5.60417e+07	5.34988e+07	2.31279e+07	2.68299e+07	2.32688e+07	2.07087e+07	2.04744e+07	C00521	ko00902,ko00903,ko01100,ko01110
NMW0041	69	41	150.141	C11H18	(E)-4,8-Dimethylnona-1,3,7-triene	Terpenoids	19945-61-0	1116	192047	119557	73269.1	2.73862e+07	1.10006e+07	1.43257e+08	4.48911e+07	5.41632e+07	4.95271e+07	3.73074e+07	9.7197e+06	2.35136e+07	6.76294e+07	7.34038e+07	6.45725e+07	5.93221e+07	5.78494e+07	C21795	-
NMW0043	107	91	150.104	C10H14O	Bicyclo[3.1.1]hept-2-en-6-one, 2,7,7-trimethyl-	Terpenoids	473-06-3	1123	133925	172649	90468.3	1.64403e+07	9.46462e+06	7.64791e+06	1.44449e+06	901815	1.17315e+06	2.62951e+06	904528	1.76702e+06	6.88215e+06	7.29563e+06	6.52031e+06	6.06789e+06	5.95833e+06	C09843	-
NMW0052	83	55	150.104	C10H14O	2-Methyl-6-methyleneocta-2,7-dien-4-one	Terpenoids	539-70-8	1145	41731.9	54717.2	27363	6.94696e+06	3.29624e+06	2.18764e+06	1.46476e+06	1.99069e+06	1.72772e+06	2.89024e+06	2.90623e+06	2.89824e+06	1.21962e+06	1.37132e+06	1.38806e+06	1.31094e+06	1.29087e+06	C20944	ko00902,ko01110
NMW0064	108	150	150.104	C10H14O	Benzofuran, 4,5,6,7-tetrahydro-3,6-dimethyl-	Terpenoids	494-90-6	1165	9345.37	19295.2	9234.29	521368	468771	661113	579980	899672	739826	1.12669e+06	1.24337e+06	1.18503e+06	604848	736330	663132	601184	514146	C09868	-
NMW0071	59	93	154.136	C10H18O	L-.alpha.-Terpineol	Terpenoids	10482-56-1	1190	2534643	3810831	3558802	5653301	4339060	3744877	14379849	18889753	16634801	19251710	21934673	2.05932e+07	7318280	7814380	7756213	7146099	6923797	C11393	ko00902,ko01100,ko01110
NMW0072	93	41	154.136	C10H18O	(1.alpha.,2.beta.,5.alpha.)-2-methyl-5-(1-methylethenyl)-Cyclohexanol	Terpenoids	38049-26-2	1192	2.80859e+06	4.18017e+06	3.96714e+06	6.26149e+06	4.7707e+06	4.10776e+06	1.60054e+07	2.09627e+07	1.8484e+07	2.1558e+07	2.45079e+07	2.3033e+07	8.37204e+06	8.74873e+06	8.63888e+06	7.99527e+06	7.771e+06	C18017	-
NMW0074	79	91	152.12	C10H16O	Bicyclo[3.1.1]hept-2-ene-2-methanol, 6,6-dimethyl-	Terpenoids	515-00-4	1195	610041	924130	863799	3.0803e+06	1.50351e+06	2.73415e+06	3.57298e+06	4.86021e+06	4.21659e+06	4.80763e+06	5.18441e+06	4.99602e+06	2.53558e+06	2.76662e+06	2.69423e+06	2.52994e+06	2.44508e+06	C11938	ko00903
NMW0075	93	121	154.136	C10H18O	Cyclohexanol, 1-methyl-4-(1-methylethylidene)-	Terpenoids	586-81-2	1197	2.81079e+06	4.18169e+06	3.97035e+06	6.23792e+06	4.7724e+06	4.10776e+06	1.59937e+07	2.09104e+07	1.8452e+07	2.14657e+07	2.43903e+07	2.2928e+07	8.37009e+06	8.74314e+06	8.62371e+06	7.97735e+06	7.75674e+06	C17518	-
NMW0082	84	83	152.12	C10H16O	(-)-trans-Isopiperitenol	Terpenoids	74410-00-7	1210	8924.09	13761.1	3910.15	1.62443e+07	7.2202e+06	4.35752e+06	1.62726e+07	1.95652e+07	1.79189e+07	1.59576e+07	1.65932e+07	1.62754e+07	6.20701e+06	7.27139e+06	7.18274e+06	6.14105e+06	5.73648e+06	C01123	ko00902,ko01110
NMW0084	79	91	152.12	C10H16O	(-)-Myrtenol	Terpenoids	19894-97-4	1213	33843	28970	33338.5	1.70658e+06	1.01059e+06	646526	1.48298e+06	1.76754e+06	1.62526e+06	1.59647e+06	1.52303e+06	1.55975e+06	1.00869e+06	952955	803610	732176	689133	C11938	ko00903
NMW0092	41	93	154.136	C10H18O	(+)-neodihydrocarveol	Terpenoids	18675-33-7	1226	17203	21188	18314.5	330476	121485	159324	309162	384603	346882	456741	541120	498930	105248	126443	111607	92592	104226	C18017	-
NMW0093	107	91	150.104	C10H14O	D-Verbenone	Terpenoids	18309-32-5	1228	14860.7	18551.5	13713.5	369321	126719	168331	336742	433731	385236	507661	621115	564388	103633	126402	101952	87914.2	99611.9	C09913	-
NMW0101	121	136	168.115	C10H16O2	Ascaridole	Terpenoids	512-85-6	1244	30685.9	38090.4	41769.4	1.38883e+07	5.06102e+06	3.60856e+06	2.5391e+06	4.92469e+06	3.73189e+06	8.72978e+06	8.29283e+06	8.5113e+06	702400	811939	1.12115e+06	810534	1.09512e+06	C09836	-
NMW0104	69	41	154.136	C10H18O	2,6-Octadien-1-ol, 3,7-dimethyl-	Terpenoids	624-15-7	1260	9.49116e+07	1.30788e+08	5.70687e+07	442061	1.73732e+08	1.06869e+08	1.35788e+08	158886	6.79732e+07	240979	211093	226036	1.21255e+08	1.27601e+08	1.06627e+08	9.58033e+07	9.9282e+07	C01500	ko00902,ko01100,ko01110
NMW0108	69	166	166.099	C10H14O2	Bicyclo[2.2.1]heptane-2,5-dione, 1,7,7-trimethyl-	Terpenoids	4230-32-4	1264	9.50475e+07	1.31017e+08	5.70956e+07	437222	1.73972e+08	1.0692e+08	1.3591e+08	158886	6.80344e+07	240979	211092	226036	1.21357e+08	1.2775e+08	1.06709e+08	9.58808e+07	9.9362e+07	C03037	-
NMW0121	135	150	150.104	C10H14O	Phenol, 2-methyl-5-(1-methylethyl)-	Terpenoids	499-75-2	1299	122081	79071.3	29002.2	3.37222e+06	1.77029e+06	1.95853e+06	538587	542787	540687	792883	448070	620477	1.05158e+06	1.26332e+06	1.35038e+06	1.09668e+06	1.35506e+06	C09840	-
NMW0123	81	59	172.146	C10H20O2	p-Menthane-3,8-diol, cis-1,3,trans-1,4-	Terpenoids	3564-98-5	1301	65880.9	141898	31897	689202	377528	327895	132891	110027	121459	126303	95933.3	111118	983288	1.05006e+06	922483	810479	791334	C02904	-
NMW0124	126	41	168.115	C10H16O2	2-Cyclohexen-1-one, 2-hydroxy-3-methyl-6-(1-methylethyl)-	Terpenoids	490-03-9	1302				21640	10084	4309	2162	5253	3707.5	9213	6526	7869.5	6906	7461	6551	5305	5742	C09854	-
NMW0141	71	67	170.131	C10H18O2	2,7-Octadiene-1,6-diol, 2,6-dimethyl-, (E)-	Terpenoids	75991-61-6	1339	2810406	3926339	2732222		2421145	456878	522486						1170823	1242620	1454303	1328835	1753547	C04433	ko00902,ko01110
NMW0144	69	41	168.115	C10H16O2	Neric Acid	Terpenoids	4613-38-1	1344	23453.7	49617.1	14037.7	1.59625e+06	1.00398e+06	475812	105407	58695.6	82051.5	200426	131478	165952	280014	314472	286395	235198	269197	C16461	ko01110
NMW0149	69	41	168.115	C10H16O2	Geranic acid	Terpenoids	459-80-3	1355	204234	345443	156697	2.10415e+06	1.68658e+06	1.87356e+06	5.92714e+06	6.42414e+06	6.17564e+06	7.37776e+06	8.32146e+06	7.84961e+06	2.05035e+06	2.14794e+06	1.901e+06	1.61872e+06	1.73084e+06	C16461	ko01110
NMW0151	79	123	166.099	C10H14O2	Bicyclo[3.1.1]hept-2-ene-2-carboxylic acid, 6,6-dimethyl-	Terpenoids	19250-17-0	1359	809761	1.17345e+06	608988	6.92661e+06	3.05841e+06	5.38737e+06	1.90003e+07	2.13316e+07	2.01659e+07	2.45536e+07	2.79507e+07	2.62521e+07	6.85429e+06	7.05759e+06	6.18391e+06	5.33358e+06	5.72595e+06	C11940	ko00903
NMW0211	68	67	166.099	C10H14O2	1-Cyclohexene-1-carboxylic acid, 4-(1-methylethenyl)-	Terpenoids	7694-45-3	1484	127408	269310	50145.4	2.14309e+06	2.18421e+06	1.24059e+06	1.72543e+06	661043	1.19323e+06	1.01883e+06	1.32476e+06	1.1718e+06	947594	924477	854565	671458	752505	C11924	ko00903
NMW0227	93	119	204.188	C15H24	(Z)-1-Methyl-4-(6-methylhept-5-en-2-ylidene)cyclohex-1-ene	Terpenoids	13062-00-5	1515	264908	477045	127088	4.09871e+06	3.80645e+06	1.87958e+06	2.46832e+06	952482	1.7104e+06	1.53658e+06	2.0814e+06	1.80899e+06	1.20711e+06	1.1687e+06	1.16656e+06	827290	1.0506e+06	C16814	ko00909
NMW0249	69	81	218.203	C16H26	(3E,7E)-4,8,12-Trimethyltrideca-1,3,7,11-tetraene	Terpenoids	62235-06-7	1577	1.93815e+06	4.23954e+06	1.30305e+06	992370	1.27563e+06	1.3782e+06	2.69936e+06	2.1271e+06	2.41323e+06	2.61235e+06	2.88397e+06	2.74816e+06	2.72107e+06	2.95287e+06	2.64485e+06	2.14287e+06	2.56212e+06	C20700	ko00904
NMW0252	122	94	230.131	C15H18O2	(5R,6R)-3,6-Dimethyl-5-(prop-1-en-2-yl)-6-vinyl-6,7-dihydrobenzofuran-4(5H)-one	Terpenoids	20493-56-5	1590	551500	1.21355e+06	371704	285093	343367	378718	756833	598754	677794	734928	808877	771903	760863	817401	733278	595727	716503	C16943	-
NMW0280	143	85	238.193	C15H26O2	2-Furanmethanol, tetrahydro-.alpha.,.alpha.,5-trimethyl-5-(4-methyl-3-cyclohexen-1-yl)-, [2S-[2.alpha.,5.beta.(R*)]]-	Terpenoids	26184-88-3	1655	42379.4	70859.3	31642	13596.1	13303.3	10777.6	14669.6	10732	12700.8	15300.5	17623.7	16462.1	17700.6	16910.2	18052.9	14661.7	21833	C16774	-
NMW0299	94	41	220.183	C15H24O	Santalol, E-cis,epi-.beta.-	Terpenoids	14490-17-6	1695	58759.3	109002	47885.3	14946.4	99003.3	75939.6	96084.1	35439.9	65762	35538	29460.5	32499.2	97653.9	104713	85354.6	63536.4	88368.4	C09720	-
NMW0306	94	122	220.183	C15H24O	(Z)-epi-.beta.-Santalol	Terpenoids	79081-90-6	1709	2473.25	8028.39	1872.98	74719.9	97695.4	32578.5	47094.1						13917.7	17213.6	16935.7	11533.1	16809.6	C09720	-
NMW0308	93	55	218.167	C15H22O	2,6,9,11-Dodecatetraenal, 2,6,10-trimethyl-	Terpenoids	4955-32-2	1712	23713.2	65332.9	16612.9	612861	856913	301185	361764		361764	73921.2	60087.5	67004.3	104484	128808	124391	79789.1	120620	C09729	-
NMW0310	69	41	222.198	C15H26O	2,6,10-Dodecatrien-1-ol, 3,7,11-trimethyl-	Terpenoids	4602-84-0	1714	21184.3	34283.4	18593.6	77406.2	65782.8	34490.2	38293.9	25099.3	31696.6	48109.2	48150.6	48129.9	33899.3	38150.4	33365.1	26547.5	41377.3	C01126	ko00900,ko00909,ko01110
NMW0319	69	41	220.183	C15H24O	2,6,10-Dodecatrienal, 3,7,11-trimethyl-, (E,E)-	Terpenoids	502-67-0	1737	21653.6	34288.7	16871.8	77129	66636.7	28523.1	39103.3	23967.5	31535.4	44479.5	44450.9	44465.2	33116	37885	34959.7	28466.8	43063	C03461	ko00900,ko00909,ko01110
NMW0349	122	94	230.131	C15H18O2	Furanodienone	Terpenoids	24268-41-5	1793	13469.8	28231.4	10192.9	85996.8	73791.2	38151.1	40752.5	21075.1	30913.8	38832.1	35777.2	37304.7	37436.2	29464.2	35601.3	25300.9	42606.7	C16960	-
NMW0350	124	41	222.126	C13H18O3	(S,E)-4-Hydroxy-3,5,5-trimethyl-4-(3-oxobut-1-en-1-yl)cyclohex-2-enone	Terpenoids	39763-33-2	1800	2710.91	7684	1693.18	21239.3	20321.7	8652.6	11675.5	7377.21	9526.37	13844.2	13414.9	13629.6	11734.4	12076	10073.4	4939.38	12038.9	C02533	-
NMW0437	69	41	290.261	C20H34O	(E,E)-3,7,11,15-tetramethyl-1,6,10,14-Hexadecatetraen-3-ol	Terpenoids	1113-21-9	2034				361822	506564	231948	604627	53332.4	328980	121966	158536	140251	46664.7	55971.3	59412.6	31870.7	48803.3	C20681	ko00904
NMW0441	91	92	272.25	C20H32	(4aS,4bS,10aS)-7-Isopropyl-1,1,4a-trimethyl-1,2,3,4,4a,4b,5,9,10,10a-decahydrophenanthrene	Terpenoids	122712-77-0	2040				944840	1.19702e+06	562371	1.40657e+06	145573	776073	330362	413826	372094	119183	148870	156354	81182	116002	C11879	ko00904,ko01110
NMW0783	93	92	136.125	C10H16	(1S)-2,6,6-Trimethylbicyclo[3.1.1]hept-2-ene	Terpenoids	7785-26-4	937	248276	442012	116617	9.82999e+07	4.01309e+07	7.26796e+07	7.91573e+07	8.58417e+07	8.24995e+07	1.06361e+08	1.5157e+08	1.28965e+08	3.90793e+07	5.05152e+07	3.74187e+07	3.0398e+07	3.69179e+07	C09880	ko00903,ko01110
QWM0003	68	67	152.12	C10H16O	2H-Pyran, 3,6-dihydro-4-methyl-2-(2-methyl-1-propenyl)-	Terpenoids	1786-08-9	1154				450569	218952	318022	73268.1	125278	99272.9	110298	177788	144043	6.26551e+06	6.65041e+06	6.0765e+06	5.60281e+06	5.39428e+06	-	-
w05	69	41	220.183	C15H24O	2,6,10-Dodecatrienal, 3,7,11-trimethyl-	Terpenoids	19317-11-4	1656	962760	1.80273e+06	872095	151012	283482	407513	541119	369624	455372	393951	368837	381394	1.72827e+06	1.86738e+06	1.66515e+06	1.34572e+06	1.54513e+06	C03461	ko00900,ko00909,ko01110
w38	161	69	204.188	C15H24	1H-3a,7-Methanoazulene, octahydro-3,8,8-trimethyl-6-methylene-, [3R-(3.alpha.,3a.beta.,7.beta.,8a.alpha.)]-	Terpenoids	546-28-1	1421	1.52535e+07	3.29379e+07	8.16721e+06	9.5437e+06	6.42972e+06	6.36164e+06	9.11671e+06	7.46428e+06	8.2905e+06	8.63862e+06	1.11804e+07	9.90949e+06	2.38424e+07	2.43765e+07	2.06322e+07	1.77412e+07	2.05139e+07	-	-
w48	139	69	154.136	C10H18O	2H-Pyran, tetrahydro-4-methyl-2-(2-methyl-1-propenyl)-	Terpenoids	16409-43-1	1111	3.19219e+06	3.38428e+06	2.53491e+06	504767	6.11971e+06	3.35366e+06	5.6408e+06	1.8843e+06	3.76255e+06	1.04002e+06	1.01021e+06	1.02512e+06	3.90673e+06	4.34588e+06	4.02975e+06	3.63161e+06	3.46192e+06	-	-
WMW0003	107	161	204.188	C15H24	Eremophilene	Terpenoids	10219-75-7	1494	1.47971e+07	2.99755e+07	8.70716e+06	2.20496e+06	1.51426e+06	720073	624160	346149	485155	500257	612026	556142	2.02391e+07	2.10016e+07	1.72543e+07	1.47862e+07	1.65444e+07	-	-
WMW0007	107	93	204.188	C15H24	[1S-(1.alpha.,7.alpha.,8a.beta.)]-1,2,3,5,6,7,8,8a-octahydro-1,4-dimethyl-7-(1-methylethenyl)-Azulene	Terpenoids	3691-11-0	1505	3.62538e+06	1.10758e+07	1.68752e+06	2.14642e+06	1.65326e+06	990028	880383	349598	614990	459702	599560	529631	7.74696e+06	8.11086e+06	6.85491e+06	5.66607e+06	6.35461e+06	C20174	-
WMW0010	81	93	204.188	C15H24	beta-Elemen	Terpenoids	515-13-9	1391	1.59051e+06	2.68604e+06	855567	198294	2.76063e+06	1.51943e+06	2.05587e+06	91687.1	1.07378e+06	107042	105773	106408	2.16873e+06	2.36536e+06	2.11763e+06	1.83707e+06	2.05367e+06	C17094	-
WMW0011	81	67	152.12	C10H16O	Cyclohexanone, 5-methyl-2-(1-methylethenyl)-	Terpenoids	529-00-0	1179	12460.3	17179.5	11830.6	3.04098e+06	1.30318e+06	1.70058e+06	2.69414e+06	3.87295e+06	3.28355e+06	4.81795e+06	5.39437e+06	5.10616e+06	1.01595e+06	1.09481e+06	1.14931e+06	1.10832e+06	1.09193e+06	-	-
WMW0013	161	105	204.188	C15H24	Bicyclosesquiphellandrene	Terpenoids	54324-03-7	1489	5.00464e+06	1.03163e+07	2.40005e+06	3.132e+07	3.11097e+07	1.76167e+07	2.48603e+07	8.33924e+06	1.65998e+07	1.27089e+07	1.72448e+07	1.49768e+07	1.67368e+07	1.67327e+07	1.52154e+07	1.20334e+07	1.34205e+07	-	-
WMW0014	55	69	152.12	C10H16O	Pinocamphone	Terpenoids	547-60-4	1160	23105.4	28997.5	24378.6	277259	318391	226618	280286	70611.9	175449	83937.9	75718.1	79828	1.10235e+06	1.19599e+06	1.26227e+06	1.17377e+06	1.1704e+06	-	-
WMW0015	71	111	154.136	C10H18O	Terpinen-4-ol	Terpenoids	562-74-3	1177	103236	130750	85984.1	2.32591e+07	1.02494e+07	1.36123e+07	2.13079e+07	3.04016e+07	2.58548e+07	3.74837e+07	4.18305e+07	3.96571e+07	7.86339e+06	8.44409e+06	8.99473e+06	8.70016e+06	8.64227e+06	C17073	-
WMW0021	159	160	202.172	C15H22	trans-Calamenene	Terpenoids	73209-42-4	1529	1.00613e+06	1.58794e+06	685644	171698	121136	69123.8	90051.8	53906.1	71978.9	71368.5	95142.8	83255.7	984396	968267	893330	766369	888275	-	-
WMW0022	123	81	220.183	C15H24O	Salvial-4(14)-en-1-one	Terpenoids	73809-82-2	1595	950670	1941687	646239	609321	691007	991129	1665476	1247083	1.45628e+06	1546233	1679044	1.61264e+06	1389389	1389493	1376230	1123494	1351775	-	-
WMW0023	93	92	136.125	C10H16	(+)-alpha-Pinene	Terpenoids	7785-70-8	932	248176	429839	116582	9.85015e+07	4.02084e+07	7.27349e+07	7.93025e+07	8.59275e+07	8.2615e+07	1.06571e+08	1.51887e+08	1.29229e+08	3.91525e+07	5.06194e+07	3.74898e+07	3.04612e+07	3.69996e+07	C06306	-
WMW0024	107	135	150.104	C10H14O	Verbenone	Terpenoids	80-57-9	1205	9544.36	9682.52	13850.2	1.45881e+06		499324	359831	484493	422162	647204	545721	596462	278411	315656	282426	268716	268340	C09913	-
WMW0025	135	150	150.104	C10H14O	Thymol	Terpenoids	89-83-8	1291	9909.26	17626.2	4894.94	2.82458e+06	1.71254e+06	1.16077e+06	3.13671e+06	3.46725e+06	3.30198e+06	4.12044e+06	4.56048e+06	4.34046e+06	1.277e+06	1.36786e+06	1.2658e+06	1.10876e+06	1.15192e+06	C09908	-
WMW0040	93	41	136.125	C10H16	trans-.beta.-Ocimene	Terpenoids	3779-61-1	1049	1.60601e+07	2.27603e+07	8.8638e+06	372843	3.19094e+07	1.78165e+07	2.50963e+07	330727	1.27135e+07	511890	481487	496688	1.77375e+07	2.10831e+07	1.94781e+07	1.70865e+07	1.8213e+07	C09873	-
WMW0041	41	55	152.12	C10H16O	Isopinocarveol	Terpenoids	6712-79-4	1178	9804.95	11896.8	9521.52	2.11526e+06	952120	1.23136e+06	1.90254e+06	2.67048e+06	2.28651e+06	3.258e+06	3.60559e+06	3.43179e+06	761589	805862	833111	810137	798261	-	-
WMW0042	70	92	152.12	C10H16O	Bicyclo[3.1.1]heptan-3-ol, 6,6-dimethyl-2-methylene-	Terpenoids	5947-36-4	1138				271468	142264	75956.3	13393.6	5988.18	9690.88	12502.3	14646.4	13574.3	77486.2	85159.4	86692.1	76552.6	79375.3	C11941	ko00903
WMW0043	69	41	222.198	C15H26O	d-Nerolidol	Terpenoids	142-50-7	1544	1.24068e+06	2.12966e+06	696958	4.14238e+06	7.29786e+06	3.61336e+06	4.48782e+06	47804.5	2.26781e+06	584999	363492	474246	2.69296e+06	2.8025e+06	2.41735e+06	1.96763e+06	2.39107e+06	C09704	ko00909,ko01100
WMW0051	177	91	192.151	C13H20O	β-Ionone	Terpenoids	14901-07-6	1491	423108	915234	382961	216323	293948	233454	289487	234039	261763	284047	270959	277503	404396	430446	350955	313782	386447	-	-
WMW0052	93	107	204.188	C15H24	(E)-1-Methyl-4-(6-methylhept-5-en-2-ylidene)cyclohex-1-ene	Terpenoids	53585-13-0	1533	515981	1.03548e+06	315878	1.75941e+06	2.13425e+06	1.05774e+06	1.64532e+06	556301	1.10081e+06	894108	1.18904e+06	1.04157e+06	1.18806e+06	1.21157e+06	1.0829e+06	823063	1.04341e+06	-	-
WMW0075	41	69	222.198	C15H26O	1,6,10-Dodecatrien-3-ol, 3,7,11-trimethyl-	Terpenoids	7212-44-4	1563	315729	651056	202084	382669	512683	586838	912875	641216	777045	799805	869127	834466	744362	795338	700292	558195	684849	C09704	ko00909,ko01100
WMW0148	119	121	204.188	C15H24	Spiro[4.5]dec-7-ene, 1,8-dimethyl-4-(1-methylethenyl)-, [1S-(1.alpha.,4.beta.,5.alpha.)]-	Terpenoids	24048-44-0	1471	645811	1399671	334498										737362	763268	660657	547323	628515	-	-
WMW0149	95	150	222.198	C15H26O	Cedrol	Terpenoids	77-53-2	1600	1550146	3408746	1052482	1056196	1204716	1892802	2936776	2346319	2.64155e+06	2890267	3130236	3.01025e+06	2354134	2565635	2314729	1884374	2247044	C09631	-
WMW0159	94	109	152.12	C10H16O	(+)-(1R,4R,5R)-2-(10)-PINEN-4-OL	Terpenoids	13040-03-4	1140	26868.2	25253.9	22220	3.13354e+06	1.45026e+06	935539	884367	1.25292e+06	1.06865e+06	1.78925e+06	1.91644e+06	1.85284e+06	580309	619652	610916	588337	587049	-	-
WMW0194	110	81	152.12	C10H16O	Thujone	Terpenoids	546-80-5	1103	460702	312559	171794	8.22908e+07	3.50426e+07	4.72248e+08	1.43034e+08	1.75279e+08	1.59157e+08	1.17975e+08	2.8317e+07	7.3146e+07	2.15758e+08	2.34737e+08	2.09282e+08	1.92352e+08	1.88472e+08	C09906	-
WMW0201	93	79	136.125	C10H16	Bicyclo[2.2.1]heptane, 7,7-dimethyl-2-methylene-	Terpenoids	471-84-1	950	29891.5	47020.5	13985.7	7.68557e+06	3.56621e+06	4.63171e+06	4.24009e+06	4.60615e+06	4.42312e+06	6.50729e+06	8.632e+06	7.56964e+06	6.47125e+06	8.60783e+06	6.42726e+06	5.31587e+06	6.28867e+06	-	-
WMW0204	92	91	194.131	C12H18O2	Bicyclo[3.1.0]hexan-3-ol, 4-methylene-1-(1-methylethyl)-, acetate	Terpenoids	3536-54-7	1292	83822.1	124626	39815.4	1.65028e+07	1.28332e+07	8.34614e+06	2.57138e+07	2.67465e+07	2.62301e+07	3.12347e+07	3.41796e+07	3.27071e+07	8.12424e+06	9.01746e+06	7.51356e+06	6.54329e+06	6.67779e+06	-	-
WMW0215	93	91	136.125	C10H16	.beta.-Ocimene	Terpenoids	13877-91-3	1037	1.08833e+07	1.56205e+07	5.8589e+06		2.121e+07	1.31812e+07	1.79817e+07						1.15465e+07	1.37564e+07	1.25997e+07	1.10135e+07	1.18861e+07	-	-
WMW0220	161	41	204.188	C15H24	2H-2,4a-Methanonaphthalene, 1,3,4,5,6,7-hexahydro-1,1,5,5-tetramethyl-, (2S)-	Terpenoids	1135-66-6	1391	3.25137e+06	6.4406e+06	1.73548e+06	2.75459e+06	2.29329e+06	1.22974e+06	1.19693e+06	208845	702887	290093	330568	310331	4.31013e+06	4.41376e+06	3.92e+06	3.15527e+06	3.89382e+06	-	-
WMW0221	81	41	152.12	C10H16O	Bicyclo[3.1.0]hexan-3-one, 4-methyl-1-(1-methylethyl)-	Terpenoids	1125-12-8	1119	4.10275e+06	5.41443e+06	2.54871e+06	4.35552e+08	2.68732e+08	2.16336e+08	4.73377e+07	2.96735e+07	3.85056e+07	8.37251e+07	2.9864e+07	5.67945e+07	2.0289e+08	2.14613e+08	1.9092e+08	1.77259e+08	1.73336e+08	-	-
WMW0223	41	119	204.188	C15H24	Cedrene	Terpenoids	11028-42-5	1422	5.30734e+06	1.02695e+07	3.0345e+06	3.79342e+06	2.58546e+06	2.58364e+06	3.63268e+06	3.04933e+06	3.341e+06	3.5016e+06	4.40713e+06	3.95437e+06	8.17651e+06	8.31867e+06	7.02935e+06	6.12572e+06	6.8951e+06	-	-
XMW0004	93	41	136.125	C10H16	Bicyclo[3.1.1]heptane, 6,6-dimethyl-2-methylene-, (1S)-	Terpenoids	18172-67-3	943	29813.6	44789.2	13792.7	8.06284e+06	3.5327e+06	4.54819e+06	4.24724e+06	4.62783e+06	4.43754e+06	6.51765e+06	8.42883e+06	7.47324e+06	6.4726e+06	8.60107e+06	6.31631e+06	5.20965e+06	6.1869e+06	C06307	ko00902,ko01110
XMW0009	161	189	204.188	C15H24	Naphthalene, 1,2,4a,5,8,8a-hexahydro-4,7-dimethyl-1-(1-methylethyl)-, [1S-(1.alpha.,4a.beta.,8a.alpha.)]-	Terpenoids	523-47-7	1518	565972	1.18134e+06	291710	1.54797e+06	1.38414e+06	742643	927531	300090	613810	484862	642555	563709	1.05939e+06	1.07692e+06	946960	775493	958700	C09625	-
XMW0012	105	161	204.188	C15H24	Naphthalene, 1,2,4a,5,6,8a-hexahydro-4,7-dimethyl-1-(1-methylethyl)-, [1S-(1.alpha.,4a.beta.,8a.alpha.)]-	Terpenoids	24406-05-1	1538	586540	1.13576e+06	281256	1.07319e+06	2.05879e+06	926518	1.14469e+06	14169.5	579429	144296	91649.9	117973	933069	1.09413e+06	834753	685201	926550	C16815	-
XMW0013	93	91	136.125	C10H16	1,7,7-trimethyl-Tricyclo[2.2.1.0(2,6)]heptane	Terpenoids	508-32-7	925	79669.6	115540	42546.9	5.67753e+06	2.8191e+06	4.07839e+06	2.51755e+06	2.7237e+06	2.62063e+06	3.57047e+06	4.82252e+06	4.1965e+06	1.41242e+06	1.84622e+06	1.41751e+06	1.13407e+06	1.28213e+06	C20241	-
XMW0022	95	109	168.115	C10H16O2	Iridomyrmecin	Terpenoids	485-43-8	1463	582001	1.3286e+06	295855	548470	428855	386082	574807	429259	502033	523937	702384	613160	1.02475e+06	1.04653e+06	880216	736573	877062	C09786	-
XMW0027	161	122	222.198	C15H26O	Ledol	Terpenoids	577-27-5	1565	138685	315065	95449.9	76921.4	134723	128315	169563	107106	138335	122494	130139	126316	199415	231406	209701	160886	207610	C09698	-
XMW0031	85	95	222.198	C15H26O	1,4-Methanoazulen-3-ol, decahydro-1,5,5,8a-tetramethyl-, [1S-(1.alpha.,3.beta.,3a.beta.,4.alpha.,8a.beta.)]-	Terpenoids	99481-30-8	1593	215646	453638	147178	162429	178253	247877	409681	310942	360312	394620	426494	410557	315573	359002	331881	266004	321246	-	-
XMW0045	119	121	204.188	C15H24	(1R,4R,4aS,8aR)-4,7-Dimethyl-1-(prop-1-en-2-yl)-1,2,3,4,4a,5,6,8a-octahydronaphthalene	Terpenoids	92692-39-2	1458	542555	1.36351e+06	290390	1.02494e+07	9.31477e+06	5.38574e+06	9.14598e+06	6.57707e+06	7.86152e+06	7.73512e+06	8.9322e+06	8.33366e+06	4.29021e+06	4.24409e+06	3.70079e+06	3.02402e+06	3.68585e+06	C16028	ko00909,ko01110
XMW0050	119	91	220.183	C15H24O	Isospathulenol	Terpenoids	88395-46-4	1638	754930	1681013	473278	38691	26984		11635	4930.05	8282.52	9593	10481.7	10037.3	457558	519061	441514	376855	454858	-	-
XMW0054	41	119	220.183	C15H24O	Farnesene epoxide, E-	Terpenoids	83637-40-5	1624	34592.9	60951.5	26584.9	77836.1	166295	68568.9	105328	1668.6	53498.1	8774.36	5657.94	7216.15	51636.7	58969.5	52248	40555.1	47501.5	-	-
XMW0084	121	136	136.125	C10H16	2,4,6-Octatriene, 2,6-dimethyl-	Terpenoids	673-84-7	1131	130044	163966	75690.2		264476	168018	211674	19184.7	115429	29893.7	36407.9	33150.8	140826	167949	163472	131138	143687	-	-
XMW0127	119	91	134.11	C10H14	o-Cymene	Terpenoids	527-84-4	1022	153439	165043	94719.1	5.15244e+07	2.62833e+07	2.41372e+07	2.29197e+07	2.65417e+07	2.47307e+07	3.80962e+07	3.64188e+07	3.72575e+07	9.77081e+06	1.17091e+07	1.0269e+07	8.98497e+06	1.05118e+07	-	-
XMW0131	119	93	204.188	C15H24	Di-epi-.alpha.-cedrene	Terpenoids	50894-66-1	1400	614921	1.22744e+06	359157	1.93706e+06	1.76133e+06	938678	929149	152514	540832	219235	205059	212147	1.02436e+06	1.02479e+06	902124	719132	873976	-	-
XMW0136	157	142	200.157	C15H20	4-Isopropyl-6-methyl-1-methylene-1,2,3,4-tetrahydronaphthalene	Terpenoids	50277-34-4	1563	428137	677739	273654	50287.3	29088.7	15169.1	14613.9	10003.2	12308.5	9760.32	16055.8	12908.1	393184	393502	370094	314987	379091	-	-
XMW0151	161	204	204.188	C15H24	Epizonarene	Terpenoids	41702-63-0	1501	187696416	363168600	103148412	23868055	1.39288e+07	4.94734e+06	4.23001e+06	1.23401e+06	2.73201e+06	1.62128e+06	3.64918e+06	2.63523e+06	250345401	258554159	217720368	190089228	210840731	-	-
XMW0157	150	151	220.183	C15H24O	(2R,3R,6S)-6-Isopropyl-3-methyl-2-(prop-1-en-2-yl)-3-vinylcyclohexanone	Terpenoids	39020-72-9	1498	10533.1	13475.3	3694.48	131675	138047	279771	298791	249605	274198	330210	355734	342972	147314	144054	133352	97881.7	128111	-	-
XMW0165	81	41	222.198	C15H26O	Cyclohexanol, 3-ethenyl-3-methyl-2-(1-methylethenyl)-6-(1-methylethyl)-, [1R-(1.alpha.,2.alpha.,3.beta.,6.alpha.)]-	Terpenoids	35727-45-8	1701	234760	387557	109364	2.20378e+06	1.26155e+06	580663	137793	18915.4	78354.2	192191	144301	168246	219042	228653	212379	154660	237931	-	-
XMW0176	105	161	204.188	C15H24	[1α,4aα,8aα]-1,2,4a,5,6,8a-hexahydro-4-7-dimethyl-1-[1-methylethyl]naphthalene	Terpenoids	31983-22-9	1496	7.72417e+07	1.53537e+08	4.41617e+07	1.02773e+07	6.192e+06	2.04496e+06	1.56099e+06	532449	1.04672e+06	636254	1.53168e+06	1.08397e+06	1.04612e+08	1.08339e+08	8.8926e+07	7.70934e+07	8.60725e+07	-	-
XMW0182	133	91	204.188	C15H24	(3S,3aS,6R,8aS)-3,8,8-Trimethyl-7-methyleneoctahydro-1H-3a,6-methanoazulene	Terpenoids	31145-21-8	1444	670688	1.65588e+06	342895	123913	107131	48701.4	46818.8	14517.7	30668.2	26361.1	36183	31272	1.0452e+06	1.07091e+06	922888	763912	922918	-	-
XMW0195	41	67	206.203	C15H26	1H-Cycloprop[e]azulene, decahydro-1,1,4,7-tetramethyl-, [1aR-(1a.alpha.,4.beta.,4a.beta.,7.beta.,7a.beta.,7b.alpha.)]-	Terpenoids	28580-43-0	1373	1.84254e+06	2.68012e+06	1.01116e+06	27544	3.70053e+06	1.9843e+06	2.85676e+06	47875.9	1.45232e+06	82333.6	82695.1	82514.3	2.11804e+06	2.39759e+06	2.21708e+06	1.95042e+06	2.12237e+06	-	-
XMW0197	161	105	204.188	C15H24	(1S,4S,4aS)-1-Isopropyl-4,7-dimethyl-1,2,3,4,4a,5-hexahydronaphthalene	Terpenoids	267665-20-3	1458	1.35019e+06	3.22e+06	700099	2.23762e+07	2.02902e+07	1.15414e+07	1.98213e+07	1.41665e+07	1.69939e+07	1.66591e+07	1.9256e+07	1.79575e+07	9.44729e+06	9.35035e+06	8.1121e+06	6.64215e+06	8.15449e+06	-	-
XMW0227	187	145	202.172	C15H22	aR-Himachalene	Terpenoids	19419-67-1	1542	12561.8	15031.3	9091.16	16897.6	22982.8	15488.9	18127			5890.91	4213.64	5052.28	15670.6	15925.9	12561	11431.8	12574.7	-	-
XMW0248	82	39	150.104	C10H14O	2-Cyclohexen-1-one, 3-methyl-6-(1-methylethenyl)-, (S)-	Terpenoids	16750-82-6	1190	64476.1	71284.8	92969.3	428756	157353	153708	325955	529165	427560	537111	599126	568119	126936	155078	168522	162308	167421	C02289	-
XMW0262	159	117	202.172	C15H22	1,1,7,7a-Tetramethyl-1a,2,6,7,7a,7b-hexahydro-1H-cyclopropa[a]naphthalene	Terpenoids	154098-14-3	1440	35260.6	74744.4	20445.2										45888.5	46401.4	40953.1	33905.2	39563	-	-
XMW0264	161	105	204.188	C15H24	Bicyclo[4.4.0]dec-1-ene, 2-isopropyl-5-methyl-9-methylene-	Terpenoids	150320-52-8	1507	3.49873e+06	9.73816e+06	1.61297e+06	1.46491e+06	1.26991e+06	722829	726030	309200	517615	382542	510124	446333	6.36711e+06	6.67549e+06	5.585e+06	4.65536e+06	5.23598e+06	-	-
XMW0311	192	149	220.183	C15H24O	Dehydroxy-isocalamendiol	Terpenoids	1005276-30-1	1646	42604.1	77759.5	36495.2	5295.37	6244.06	6977.63	7278.53	5502.89	6390.71	6454.53	6365.59	6410.06	69457	73152.6	69421.8	54812.5	63412.9	-	-
XMW0361	95	67	152.12	C10H16O	5,7-Octadien-4-one, 2,6-dimethyl-, (E)-	Terpenoids	6752-80-3	1146	54981.2	54222.3	43900.4	7.78143e+06	3.8022e+06	2.12571e+06	992381	1.28863e+06	1.14051e+06	2.01711e+06	2.00666e+06	2.01188e+06	1.36142e+06	1.5167e+06	1.4929e+06	1.41076e+06	1.37312e+06	-	-
XMW0379	93	133	204.188	C15H24	Bicyclo[5.2.0]nonane, 2-methylene-4,8,8-trimethyl-4-vinyl-	Terpenoids	242794-76-9	1407	77241.2	170401	44152.2	1.67292e+06	965957	414227	85232.4	28403.8	56818.1	284922	89788	187355	334645	363416	324995	267690	294630	-	-
XMW0384	161	189	204.188	C15H24	4,7-Methanoazulene, 1,2,3,4,5,6,7,8-octahydro-1,4,9,9-tetramethyl-, [1S-(1.alpha.,4.alpha.,7.alpha.)]-	Terpenoids	514-51-2	1381	2.77733e+06	6.27421e+06	1.40388e+06	951185	924825	523387	466623	162556	314589	207928	300221	254074	4.4333e+06	4.37633e+06	3.78027e+06	3.15923e+06	3.81799e+06	-	-
XMW0385	161	204	222.198	C15H26O	Carotol	Terpenoids	465-28-1	1594	924796	1938309	642094	608060	653566	907690	1426500	1178473	1.30249e+06	1466468	1596399	1.53143e+06	1387963	1511419	1347739	1138716	1352008	C09628	-
XMW0388	161	122	204.188	C15H24	(4aR,8aR)-5,8a-dimethyl-3-propan-2-ylidene-1,2,4,4a,7,8-hexahydronaphthalene	Terpenoids	6813-21-4	1542	842702	1.61876e+06	452276	2.28278e+06	4.21413e+06	1.86609e+06	2.44544e+06	6628.51	1.22604e+06	255491	141440	198466	1.69443e+06	1.75964e+06	1.52847e+06	1.24935e+06	1.49827e+06	-	-
XMW0389	111	123	222.198	C15H26O	Caryophyllenyl alcohol	Terpenoids	913176-41-7	1574	25870.8	42366.8	14281.1	125784	140296	143974	247364	194184	220774	250614	276065	263339	90322.9	93894.3	86116.5	69207.4	83877.6	-	-
XMW0391	202	187	202.172	C15H22	3,5,11-Eudesmatriene	Terpenoids	193615-07-5	1495	49669.6	104377	38235.5	108322	87012.1	92688.3	94155.1	80305.5	87230.3	125246	171739	148493	109911	99154.3	86046.7	74461.1	90546.6	-	-
XMW0392	185	200	200.157	C15H20	.alpha.-Corocalene	Terpenoids	20129-39-9	1623	18042.2	24755.2	14238.3	15327.5	15677.3	8749.91	12614.7	5292.27	8953.51	9114.69	10687.3	9900.97	14789.8	17360	16380.3	13778.9	16995.8	-	-
XMW0468	93	41	204.188	C15H24	Bicyclo[3.1.1]hept-2-ene, 2,6-dimethyl-6-(4-methyl-3-pentenyl)-	Terpenoids	17699-05-7	1435	2.47481e+07	5.02228e+07	1.3728e+07	1.72508e+07	1.16309e+07	1.17088e+07	1.66553e+07	1.37831e+07	1.52192e+07	1.58658e+07	2.0343e+07	1.81044e+07	3.86632e+07	3.95669e+07	3.3232e+07	2.90166e+07	3.31241e+07	C17088	-
XMW0504	119	41	204.188	C15H24	1H-Benzocycloheptene, 2,4a,5,6,7,8-hexahydro-3,5,5,9-tetramethyl-, (R)-	Terpenoids	1461-03-6	1500	579201	964938	416171	5.10087e+06	6.20192e+06	5.23527e+06	7.5478e+06	4.01011e+06	5.77896e+06	5.50701e+06	6.467e+06	5.98701e+06	3.14334e+06	3.01218e+06	2.93243e+06	2.25706e+06	2.77061e+06	-	-
XMW0529	95	93	172.102	C10H17Cl	Bicyclo[2.2.1]heptane, 2-chloro-1,7,7-trimethyl-, (1R-endo)-	Terpenoids	30462-53-4	1116	241635	150229	83490.6	4.1675e+07	1.67767e+07	2.46311e+08	7.02662e+07	8.63321e+07	7.82991e+07	5.78248e+07	1.43188e+07	3.60718e+07	1.08502e+08	1.17323e+08	1.0383e+08	9.50764e+07	9.31238e+07	-	-
XMW0530	59	94	152.12	C10H16O	p-Mentha-1,5-dien-8-ol	Terpenoids	1686-20-0	1167	236576	268800	674436	1.67886e+06	918909	972230	2.23908e+06	2.78333e+06	2.5112e+06	3.01074e+06	3.23946e+06	3.1251e+06	1.28396e+06	1.39157e+06	1.35705e+06	1.22124e+06	1.1669e+06	-	-
XMW0531	55	69	152.12	C10H16O	Bicyclo[3.1.1]heptan-3-one, 2,6,6-trimethyl-, (1.alpha.,2.beta.,5.alpha.)-	Terpenoids	15358-88-0	1173	108183	117453	251898	5.29393e+06	2.87274e+06	2.3677e+06	6.31779e+06	7.24145e+06	6.77962e+06	7.64858e+06	8.27186e+06	7.96022e+06	2.43727e+06	2.55286e+06	2.46162e+06	2.30462e+06	2.203e+06	-	-
XMW0534	107	135	150.104	C10H14O	Bicyclo[3.1.1]hept-3-en-2-one, 4,6,6-trimethyl-, (1S)-	Terpenoids	1196-01-6	1204	11607.6	10183.1	13029.4	1.45539e+06		474974	320708	456533	388621	647204	611524	629364	278427	300731	282449	268602	268430	-	-
XMW0544	161	81	204.188	C15H24	Azulene, 1,2,3,3a,4,5,6,7-octahydro-1,4-dimethyl-7-(1-methylethenyl)-, [1R-(1.alpha.,3a.beta.,4.alpha.,7.beta.)]-	Terpenoids	22567-17-5	1473	4.95847e+06	1.04168e+07	2.58609e+06	516212	280143	128648	112040	51904.1	81972.1	64102.9	113143	88622.7	6.40357e+06	6.68943e+06	5.84135e+06	4.88284e+06	5.56647e+06	-	-
XMW0549	108	91	204.188	C15H24	(1S,4aR,7R)-1,4a-Dimethyl-7-(prop-1-en-2-yl)-1,2,3,4,4a,5,6,7-octahydronaphthalene	Terpenoids	52026-55-8	1447	24904.5	48011.6	10636.9	361707	313197	162992	237124	112563	174843	177624	246872	212248	133390	127028	113099	85638.8	113217	-	-
XMW0558	204	85	222.198	C15H26O	1,4-Methanoazulen-9-ol, decahydro-1,5,5,8a-tetramethyl-, [1R-(1.alpha.,3a.beta.,4.alpha.,8a.beta.,9S*)]-	Terpenoids	465-24-7	1592	50930.3	79935.9	37254.1	39250.5	45985.8	37971.8	51352.2	40275	45813.6	46876.4	51272.4	49074.4	59425.5	64717.6	59083.4	51891.4	57225.5	-	-
XMW0629	204	189	204.188	C15H24	3H-3a,7-Methanoazulene, 2,4,5,6,7,8-hexahydro-1,4,9,9-tetramethyl-, [3aR-(3a.alpha.,4.beta.,7.alpha.)]-	Terpenoids	2387-78-2	1399	545093	1.1009e+06	290565	199122	160088	85934.6	80465.8	14784.7	47625.3	20080.3	25069.5	22574.9	719882	714438	624460	516103	615680	C17505	-
XMW0632	93	92	136.125	C10H16	Bicyclo[3.1.1]hept-2-ene, 3,6,6-trimethyl-	Terpenoids	4889-83-2	948	30187.7	45051.5	13776	7.51236e+06	3.57014e+06	4.51324e+06	4.24126e+06	4.61305e+06	4.42715e+06	6.50729e+06	8.45311e+06	7.4802e+06	6.47832e+06	8.60723e+06	6.38047e+06	5.2557e+06	6.22507e+06	-	-
XMW0639	79	91	202.172	C15H22	1,4-Methanobenzocyclodecene, 1,2,3,4,4a,5,8,9,12,12a-decahydro-	Terpenoids	74708-73-9	1567	85520.8	174380	50867.2	575567	406399	659484	1.25917e+06	1.21806e+06	1.23861e+06	1.55453e+06	1.74308e+06	1.64881e+06	417707	454399	393764	325406	397540	-	-
XMW0640	121	105	204.188	C15H24	Panaxene	Terpenoids	871660-95-6	1314	2940.61	9868.88	2783.05	528854	367268	251626	252433	248885	250659	376203	358076	367140	186917	205010	173406	158327	158956	-	-
XMW0654	109	67	152.12	C10H16O	Ethanone, 1-(1,4-dimethyl-3-cyclohexen-1-yl)-	Terpenoids	43219-68-7	1149	33162.3	21499.7	11675.8	3.61856e+06	1.52682e+06	1.17939e+06	491165	663908	577537	804129	849388	826758	1.92557e+07	2.03167e+07	1.88178e+07	1.74836e+07	1.68761e+07	-	-
XMW0678	121	105	136.125	C10H16	1,3-Cyclohexadiene, 1,5,5,6-tetramethyl-	Terpenoids	514-94-3	976	37933.3	71766.3	17411.2	1.52452e+07	8.95263e+06	1.15118e+07	3.38149e+06	3.43142e+06	3.40645e+06	5.80059e+06	5.73522e+06	5.7679e+06	3.31847e+06	4.56013e+06	3.23024e+06	2.82327e+06	3.13543e+06	-	-
XMW0698	108	41	204.188	C15H24	1,4-Methano-1H-indene, octahydro-4-methyl-8-methylene-7-(1-methylethyl)-, [1S-(1.alpha.,3a.beta.,4.alpha.,7.alpha.,7a.beta.)]-	Terpenoids	3650-28-0	1396	412534	621110	325418	1.82422e+06	1.94687e+06	976092	950116	147044	548580	198930	208482	203706	646996	640764	598657	478763	600451	-	-
XMW0700	189	133	204.188	C15H24	4a,8-Dimethyl-2-(prop-1-en-2-yl)-1,2,3,4,4a,5,6,7-octahydronaphthalene	Terpenoids	103827-22-1	1492	1.53915e+06	3.09369e+06	813614	237686	149266	81227	77647.9	48216	62931.9	59093.7	91848.8	75471.2	2.25685e+06	2.2254e+06	1.76657e+06	1.56932e+06	1.75337e+06	-	-
XMW0705	59	149	222.198	C15H26O	2-Naphthalenemethanol, 1,2,3,4,4a,5,6,8a-octahydro-.alpha.,.alpha.,4a,8-tetramethyl-, [2R-(2.alpha.,4a.alpha.,8a.beta.)]-	Terpenoids	473-16-5	1653	4.12661e+06	7.76733e+06	3.68305e+06	1.00647e+06	1.39623e+06	2.41581e+06	3.26933e+06	2.2812e+06	2.77527e+06	2.74876e+06	2.58464e+06	2.6667e+06	7.33993e+06	8.08243e+06	7.27532e+06	5.91351e+06	6.76003e+06	C09663	-
XMW0719	91	134	134.11	C10H14	p-Mentha-1,5,8-triene	Terpenoids	21195-59-5	1111				3.73236e+06	1.62225e+06	2.28356e+07	6.02101e+06	7.38894e+06	6.70497e+06	4.94617e+06	1.27978e+06	3.11298e+06	9.66972e+06	1.03204e+07	9.13538e+06	8.42236e+06	8.2639e+06	-	-
XMW0725	84	83	152.12	C10H16O	(-)-cis-Isopiperitenol	Terpenoids	96555-02-1	1228	8582.03	13744	3478.09	1.62159e+07	6.98238e+06	4.30958e+06	1.61212e+07	1.95492e+07	1.78352e+07	1.59475e+07	1.6567e+07	1.62572e+07	6.21559e+06	6.78597e+06	7.15072e+06	6.14158e+06	5.72211e+06	-	-
XMW0733	69	41	168.115	C10H16O2	7-Oxabicyclo[4.1.0]heptan-2-one, 3-methyl-6-(1-methylethyl)-	Terpenoids	5729-99-7	1261	9.49337e+07	1.30946e+08	5.70818e+07	442087	1.73917e+08	1.06898e+08	1.35849e+08	158886	6.8004e+07	240979	211092	226036	1.21325e+08	1.27704e+08	1.06696e+08	9.58618e+07	9.93482e+07	-	-
XMW0742	120	69	204.188	C15H24	10,10-Dimethyl-2,6-dimethylenebicyclo[7.2.0]undecane	Terpenoids	357414-37-0	1440	436386	946708	227665	33996.6	19087.9	12385.4	9314.2	10433.5	9873.86	12627.2	16925.1	14776.1	613538	626066	546115	443809	536153	-	-
XMW0743	105	161	204.188	C15H24	(-)-Aristolene	Terpenoids	6831-16-9	1447	284827	471818	118026	4.50489e+06	3.93889e+06	2.02788e+06	3.02897e+06	1.46761e+06	2.24829e+06	2.27713e+06	3.13917e+06	2.70815e+06	1.65539e+06	1.5655e+06	1.42404e+06	1.08789e+06	1.36897e+06	-	-
XMW0746	159	118	220.183	C15H24O	(1R,2R,4S,6S,7S,8S)-8-Isopropyl-1-methyl-3-methylenetricyclo[4.4.0.02,7]decan-4-ol	Terpenoids	124753-76-0	1586	301100	617039	207704	128545	139196	164399	288854	244627	266740	299820	324708	312264	398903	419138	381313	316859	397029	-	-
XMW0751	93	119	220.183	C15H24O	Bergamotol, Z-.alpha.-trans-	Terpenoids	88034-74-6	1700	316413	578204	160593	1.35779e+06	946244	449289	369335	148780	259057	315655	300551	308103	368152	332486	305505	202056	372428	-	-
XMW0764	68	79	152.12	C10H16O	(S)-(-)-(4-Isopropenyl-1-cyclohexenyl)methanol	Terpenoids	18457-55-1	1312	1959.65	3528.83	1006.64	270763	183181	133365	141600	132498	137049	207718	203151	205435	99699.6	109658	87026.9	79077.3	76781.7	C02452	ko00902,ko00903,ko01110
XMW0766	81	67	152.12	C10H16O	Cyclohexanone, 5-methyl-2-(1-methylethylidene)-	Terpenoids	15932-80-6	1212				964005	452679	264033	759870	972159	866014	804430	832435	818433	342853	386069	354864	344134	292531	-	-
XMW0780	91	119	134.11	C10H14	2,6-Dimethyl-1,3,5,7-octatetraene, E,E-	Terpenoids	460-01-5	1131	112789	124059	209804	3.60303e+07	2.19427e+07	1.71299e+07	1.55607e+06	2.37328e+06	1.96468e+06	3.04966e+06	3.4415e+06	3.24558e+06	1.62085e+07	1.69544e+07	1.52861e+07	1.43841e+07	1.41408e+07	-	-
XMW0790	105	119	162.141	C12H18	6,7-Dimethyl-1,2,3,5,8,8a-hexahydronaphthalene	Terpenoids	107914-92-1	1273					36015.9	37694.2	32677.8	38509.2	35593.5	34771.3	35580.9	35176.1	51535.7	53142.2	47597.8	39780.3	46789.9	-	-
XMW0797	105	161	204.188	C15H24	Naphthalene, 1,2,4a,5,6,8a-hexahydro-4,7-dimethyl-1-(1-methylethyl)-,[1R-(1.alpha.,4a.alpha.,8a.alpha.)]-	Terpenoids	17627-24-6	1440	1.28462e+06	2.97788e+06	658455										1.88769e+06	1.97831e+06	1.66586e+06	1.44232e+06	1.68716e+06	-	-
XMW0817	69	93	204.188	C15H24	(1S,5S,6R)-6-Methyl-2-methylene-6-(4-methylpent-3-en-1-yl)bicyclo[3.1.1]heptane	Terpenoids	15438-94-5	1492	8.68366e+06	1.63667e+07	4.99624e+06	2.21621e+06	1.66539e+06	833979	759023	375466	567244	588232	866716	727474	1.12714e+07	1.16956e+07	9.7896e+06	8.37455e+06	9.1797e+06	-	-
XMW0819	161	105	204.188	C15H24	(1S,4S,4aR)-1-Isopropyl-4-methyl-7-methylene-1,2,3,4,4a,5,6,7-octahydronaphthalene	Terpenoids	157477-72-0	1463	1.22058e+06	3.17588e+06	596522	488377	333035	322642	624843	305209	465026	381605	521570	451587	2.05004e+06	2.11576e+06	1.77064e+06	1.47558e+06	1.76069e+06	-	-
XMW0825	119	93	204.188	C15H24	Bicyclo[3.1.1]heptane, 6-methyl-2-methylene-6-(4-methyl-3-pentenyl)-, [1R-(1.alpha.,5.alpha.,6.beta.)]-	Terpenoids	55123-21-2	1446	235789	398576	92820.9	3.78272e+06	3.1754e+06	1.65401e+06	2.46644e+06	1.21955e+06	1.843e+06	1.88504e+06	2.62052e+06	2.25278e+06	1.54045e+06	1.34462e+06	1.17241e+06	925236	1.194e+06	-	-
XMW0836	59	93	222.198	C15H26O	3,7-Cyclodecadiene-1-methanol, .alpha.,.alpha.,4,8-tetramethyl-, [s-(Z,Z)]	Terpenoids	21657-90-9	1559	64408.4	174112	51304.8	5.05592e+06	8.69228e+06	3.49969e+06	4.71474e+06	45065.6	2.3799e+06	360613	295975	328294	1.70144e+06	2.04612e+06	1.89819e+06	1.37642e+06	1.58337e+06	-	-
XMW0842	41	55	222.198	C15H26O	Palustrol (Ledum)	Terpenoids	5986-49-2	1568	42714.2	78153.6	23903.9	215416	226867	241528	407429	329233	368331	436008	473091	454549	158133	163460	143262	119225	144341	-	-
XMW0853	81	135	222.198	C15H26O	(1S,4aR,7R,8aR)-1,4a-Dimethyl-7-(prop-1-en-2-yl)decahydronaphthalen-1-ol	Terpenoids	5945-72-2	1660				1.74463e+06	1.85369e+06	1.98477e+06	4.54679e+06	3.69344e+06	4.12012e+06	4.67427e+06	4.71057e+06	4.69242e+06	2.7713e+06	3.01685e+06	2.73929e+06	2.19524e+06	2.58846e+06	-	-
XMW0854	119	161	222.198	C15H26O	4a(2H)-Naphthalenol, 1,3,4,5,6,8a-hexahydro-4,7-dimethyl-1-(1-methylethyl)-, (1S,4S,4aS,8aR)-	Terpenoids	73365-77-2	1614	146790	303907	108965	502987	1.06741e+06	441756	676265	19065.9	347666	71456.3	66436.9	68946.6	345198	387957	344441	266615	311532	-	-
XMW0866	149	59	240.209	C15H28O2	7-(2-Hydroxypropan-2-yl)-1,4a-dimethyldecahydronaphthalen-1-ol	Terpenoids	92857-25-5	1799	10545.1	20410.4	5483.77	50500.1	44741.4	24081.2	31659.2	16191.1	23925.2	30311.6	31833	31072.3	30002.6	28036.3	22170.1	15845	28100.7	-	-
XMW0889	91	92	134.11	C10H14	Bicyclo[3.1.0]hex-2-ene, 4-methylene-1-(1-methylethyl)-	Terpenoids	36262-09-6	956	7253.83	7111.17	6332.58	1.61337e+06	621566	557365	173062	154509	163786	248793	235199	241996	473828	655817	473685	460997	458980	-	-
XMW0902	69	41	138.141	C10H18	2,6-Dimethyl-2-trans-6-octadiene	Terpenoids	2609-23-6	993	1.61173e+07	2.23956e+07	9.06349e+06	7.78851e+06	3.0651e+07	2.21038e+07	3.68848e+07	1.95457e+07	2.82153e+07	2.40686e+07	3.19666e+07	2.80176e+07	1.91229e+07	2.28118e+07	1.98818e+07	1.74122e+07	1.9041e+07	-	-
XMW0913	109	81	152.12	C10H16O	cis-Chrysanthenol	Terpenoids	55722-60-6	1162	33647.3	31970.3	37378.9	678391	295341	430074	303496	430157	366826	540950	521618	531284	437110	486384	472970	440760	435852	-	-
XMW0948	105	204	204.188	C15H24	Valerena-4,7(11)-diene	Terpenoids	351222-66-7	1460	558420	1.35626e+06	293523	8.55105e+06	7.77087e+06	4.55816e+06	7.61704e+06	5.53427e+06	6.57566e+06	6.44751e+06	7.45538e+06	6.95144e+06	3.82783e+06	3.7877e+06	3.29968e+06	2.70714e+06	3.28873e+06	C20480	-
XMW0954	109	67	168.115	C10H16O2	Cyclopropanecarboxylic Acid, 2,2-dimethyl-3-(2-methyl-1-propenyl)-, (1R-trans)-	Terpenoids	4638-92-0	1284					629394	307646	227979						506956	541192	442549	386345	384901	C09842	-
XMW0961	95	93	196.146	C12H20O2	Bornyl acetate	Terpenoids	76-49-3	1285				22295.2	3.81466e+06	1.64628e+06	1.80573e+06						4.11284e+06	4.50585e+06	3.63038e+06	3.01444e+06	3.09652e+06	C09837	-
XMW0964	137	121	204.188	C15H24	Petasitene	Terpenoids	443124-67-2	1402	2427.57	3721.68	1543.47	50795.7	34077	15829.2	5558.05	5107.64	5332.85	15687.1	15298.3	15492.7	138045	152103	133507	91181.9	86324	-	-
XMW0974	94	41	204.188	C15H24	1,2,4-Methenoazulene, decahydro-1,5,5,8a-tetramethyl-, [1S-(1.alpha.,2.alpha.,3a.beta.,4.alpha.,8a.beta.,9R*)]-	Terpenoids	1137-12-8	1374	15667	31335	6704.18	64510	117161	64051	109147	61724	85435.5	131551	142451	137001	50717	49874	42646	32533	39151	-	-
XMW0975	93	119	204.188	C15H24	4-(1,5-dimethyl-1,4-hexadienyl)-1-methyl-Cyclohexene	Terpenoids	17627-44-0	1518	216440	346262	104631	4.0473e+06	3.73462e+06	1.8252e+06	2.42575e+06	937889	1.68182e+06	1.47322e+06	2.05564e+06	1.76443e+06	1.21043e+06	1.1687e+06	1.1702e+06	829602	1.05415e+06	C19749	ko00909,ko01110
XMW0979	105	91	204.188	C15H24	(4R,4aS,6S)-4,4a-Dimethyl-6-(prop-1-en-2-yl)-1,2,3,4,4a,5,6,7-octahydronaphthalene	Terpenoids	823810-22-6	1476	1021102	2246270	536225										1392165	1411709	1260075	1027848	1204048	-	-
XMW0980	119	121	204.188	C15H24	(1R,3aR,4aR,8aR)-1,4,4,6-Tetramethyl-1,2,3,3a,4,4a,7,8-octahydrocyclopenta[1,4]cyclobuta[1,2]benzene	Terpenoids	94482-89-0	1395	749719	1.22011e+06	308605	1.39546e+07	1.23612e+07	6.49065e+06	8.34196e+06	3.58699e+06	5.96448e+06	5.71574e+06	7.98793e+06	6.85183e+06	4.18324e+06	4.00291e+06	3.63495e+06	2.78057e+06	3.55139e+06	-	-
XMW0987	131	119	202.172	C15H22	Eudesma-2,4,11-triene	Terpenoids	82462-31-5	1479	2.3236e+06	2.77415e+06	1.24021e+06	2.44519e+07	2.06101e+07	1.1935e+07	1.62169e+07	9.04675e+06	1.26318e+07	1.30251e+07	1.65045e+07	1.47648e+07	1.02607e+07	9.47134e+06	8.84501e+06	6.77881e+06	8.94673e+06	-	-
XMW0992	119	161	202.172	C15H22	(2R,8R,8aS)-8,8a-Dimethyl-2-(prop-1-en-2-yl)-1,2,3,7,8,8a-hexahydronaphthalene	Terpenoids	5090-61-9	1456	540845	1.36264e+06	290390	1.02494e+07	9.31477e+06	5.38574e+06	9.14537e+06	6.57707e+06	7.86122e+06	7.73369e+06	8.9322e+06	8.33294e+06	4.29021e+06	4.24264e+06	3.70079e+06	3.02402e+06	3.68486e+06	-	-
XMW1000	93	121	218.167	C15H22O	(E)-5-((1R,3R,6S)-2,3-Dimethyltricyclo[2.2.1.02,6]heptan-3-yl)-2-methylpent-2-enal	Terpenoids	19903-70-9	1679	321270	766082	209459	1.96513e+06	2.12204e+06	2.2336e+06	4.98726e+06	3.95566e+06	4.47146e+06	5.04765e+06	5.04663e+06	5.04714e+06	3.29956e+06	3.57497e+06	3.22986e+06	2.61137e+06	2.79385e+06	-	-
XMW1006	41	82	220.183	C15H24O	(1S,4R,7S,8R,11R,13R)-4,7,11-Trimethyl-5-oxatetracyclo[5.4.2.01,8.04,13]tridecane	Terpenoids	18319-31-8	1546	785412	1.35156e+06	461607	2.51001e+06	4.27426e+06	2.19162e+06	2.71702e+06	45157	1.38109e+06	387261	252861	320061	1.70085e+06	1.73874e+06	1.50917e+06	1.24543e+06	1.49453e+06	-	-
XMW1021	68	67	218.167	C15H22O	1,7-Dimethyl-4-(propan-2-ylidene)tricyclo[4.4.0.02,7]decan-3-one	Terpenoids	62332-96-1	1746	8003.38	8644.15	3811.17	23746.2	17816.3	8783.58	9929.39	4933.79	7431.59	9477.47	8539.95	9008.71	8156.74	10046.4	7682.32	6154.11	9930.91	-	-
XMW1022	107	135	218.167	C15H22O	3,7-Cyclodecadien-1-one, 3,7-dimethyl-10-(1-methylethylidene)-, (E,E)-	Terpenoids	6902-91-6	1694	77441.7	154861	62067.2	24687.2	135094	90852.6	123309	48700.6	86004.7	49446.2	36077.4	42761.8	115466	122904	104209	79307.4	103946	C16966	-
XMW1035	205	41	220.183	C15H24O	(-)-Spathulenol	Terpenoids	77171-55-2	1577	13524.4	25692.9	8419.35	75008.1	50985.8	87409.9	165519	160829	163174	204309	226214	215261	58655.2	63881.5	56173.2	45614.9	55245.4	-	-
XMW1038	95	109	220.183	C15H24O	Longifolenaldehyde	Terpenoids	19890-84-7	1591	806666	1771580	533723	348992	480260	520651	1028667	851825	940246	1037962	1144887	1.09142e+06	1077412	1162517	1039988	851314	1019628	-	-
XMW1042	161	147	218.167	C15H22O	2(3H)-Naphthalenone, 4,4a,5,6,7,8-hexahydro-4a,5-dimethyl-3-(1-methylethylidene)-, (4ar-cis)-	Terpenoids	19598-45-9	1817	7690.18	12287	5256.98	432639	187356	111667	56483.3	37315.9	46899.6	101478	72871.2	87174.4	43004.8	44922.9	43648.5	32162.6	42956.9	-	-
XMW1126	139	93	154.136	C10H18O	2-Cyclohexen-1-ol, 1-methyl-4-(1-methylethyl)-, trans-	Terpenoids	29803-81-4	1140	86721.1	88365.5	70836.5	241566	249344	152153	149283	93811.8	121547	141978	133789	137884	212405	229664	217576	217117	207737	-	-
XMW1138	69	41	154.136	C10H18O	6-Octen-1-ol, 7-methyl-3-methylene-	Terpenoids	13066-51-8	1195	482125	573825	633987	495522	351599	439694	199604	226761	213183	263512	239827	251670	346405	392258	413057	341470	345965	-	-
XMW1147	121	93	152.12	C10H16O	Tricyclo[2.2.1.0(2,6)]heptane-3-methanol, 2,3-dimethyl-	Terpenoids	29550-55-8	1286					2.18277e+07	9.48263e+06	1.04715e+07	25274.9	5.24839e+06	116545	79688.5	98116.8	2.3771e+07	2.609e+07	2.10145e+07	1.74522e+07	1.79459e+07	-	-
XMW1149	189	133	204.188	C15H24	(1R,3aS,8aS)-1,4,4,6-Tetramethyl-1,2,3,3a,4,5,7,8-octahydrocyclopenta[c]pentalene	Terpenoids	871660-96-7	1338	47015.8	125370	22631.5	30001.1	38447	20833	22662.3	5165.67	13914	7895.79	10195.9	9045.82	136773	142897	129997	110994	121895	-	-
XMW1167	109	67	220.183	C15H24O	(1R,3E,7E,11R)-1,5,5,8-Tetramethyl-12-oxabicyclo[9.1.0]dodeca-3,7-diene	Terpenoids	19888-34-7	1606	1764647	3654888	1183807	1.10003e+06	1268297	1791005	3014539	2261763	2638151	2797190	3035930	2916560	2438715	2722132	2485729	2017161	2424931	-	-
XMW1170	69	93	238.193	C15H26O2	Butanoic acid, 2-methyl-, 3,7-dimethyl-2,6-octadienyl ester, (Z)-	Terpenoids	51117-19-2	1576	62128.8	114045	41118.9	335457	337737	371187	662593	545769	604181	715414	774122	744768	246485	261160	235617	190281	230440	-	-
XMW1182	119	120	204.188	C15H24	Di-epi-.alpha.-cedrene-(I)	Terpenoids	21996-77-0	1382	2.72473e+06	5.68364e+06	1.36639e+06	1.50675e+06	1.81589e+06	1.06074e+06	721360	227711	474535	296763	448652	372707	4.68202e+06	4.67685e+06	4.0633e+06	3.39386e+06	4.08271e+06	-	-
XMW1351	136	121	204.188	C15H24	Dauca-4(11),8-diene	Terpenoids	395070-76-5	1532	16603.7	33506.3	9843.5	39374.4	81523.1	34055.4	42949.3	6469.17	24709.2	15154.7	16584.1	15869.4	34336.4	36788	33880.3	23890.4	33312.3	-	-
XMW1364	135	93	206.203	C15H26	7-Octylidenebicyclo[4.1.0]heptane	Terpenoids	82253-11-0	1522	254478	561463	130383	49549	121257	67629.1	169336	58382.6	113859	78722.2	111770	95246.2	367631	377504	334301	267757	311499	-	-
XMW1381	91	105	134.11	C10H14	Bicyclo[3.2.1]oct-2-ene, 3-methyl-4-methylene-	Terpenoids	49826-53-1	1168	39826.9	48713.1	38714.8	4.7447e+06	2.70145e+06	2.27826e+06	4.70648e+06	5.30068e+06	5.00358e+06	5.67669e+06	6.20878e+06	5.94273e+06	2.49755e+06	2.60765e+06	2.48393e+06	2.31445e+06	2.25592e+06	-	-
XMW1408	189	161	204.188	C15H24	1H-Cyclopropa[a]naphthalene, 1a,2,3,3a,4,5,6,7b-octahydro-1,1,3a,7-tetramethyl-, [1aR-(1a.alpha.,3a.alpha.,7b.alpha.)]-	Terpenoids	489-29-2	1398	87832.6	172157	43381.6	2.16556e+06	1.92995e+06	1.03979e+06	1.02626e+06	169128	597694	234969	248553	241761	486774	467220	430744	326564	413460	-	-
XMW1411	41	93	204.188	C15H24	1,3,6,10-Dodecatetraene, 3,7,11-trimethyl-, (Z,E)-	Terpenoids	26560-14-5	1491	7.83421e+06	1.51148e+07	4.6824e+06	1.46964e+06	1.03497e+06	505578	402292	191736	297014	244924	378536	311730	1.05099e+07	1.07637e+07	8.92019e+06	7.77459e+06	8.40363e+06	-	-
XMW1412	119	93	204.188	C15H24	1H-3a,7-Methanoazulene, 2,3,4,7,8,8a-hexahydro-3,6,8,8-tetramethyl-, (3R,3aS,7S,8aR)-	Terpenoids	65354-33-8	1389	2.72719e+06	5.67999e+06	1.36379e+06	1.50623e+06	1.83676e+06	1.07091e+06	726946	229625	478285	296763	451822	374293	4.70271e+06	4.68605e+06	4.07551e+06	3.37307e+06	4.0695e+06	-	-
XMW1444	110	95	152.12	C10H16O	Carvenone	Terpenoids	499-74-1	1257	3.6105e+06	5.04206e+06	2.09278e+06	1.26624e+07	8.72508e+06	5.29894e+06	5.71507e+06	1.03699e+06	3.37603e+06	2.7063e+06	1.90061e+06	2.30346e+06	6.00351e+06	6.32174e+06	5.57496e+06	4.92902e+06	5.13431e+06	-	-
XMW1501	135	96	218.167	C15H22O	(E,E,E)-2,6,9,9-tetramethyl-2,6,10-Cycloundecatrien-1-one	Terpenoids	471-05-6	1732	8732.18	12006.3	7203.76	31548.3	24414.3	9356.99	12318.5	8074.27	10196.4	15073.4	15549.6	15311.5	12500.5	14098.2	14436.3	10399	16278.7	C20262	-
